# Supplementary material
Source: publisher figshare collection journal article supplement (https://acs.figshare.com/ndownloader/files/29026256)
Supplement: Supplementary file 1 [file 29026256]

## **Supporting Information**

### **Exposure and Transport of Alkaloids and Phytoestrogens from Soybeans to Agricultural Soils and Streams in the Midwestern United States**

Jawameer R. Hama<sup>1\*</sup>, Dana W. Kolpin<sup>2</sup>, Gregory H. LeFevre<sup>3</sup>, Laura E. Hubbard<sup>4</sup>, Megan M. Powers<sup>3</sup>, and Bjarne W. Strobel<sup>1</sup>

1. Department of Plant and Environmental Sciences, University of Copenhagen, Thorvaldsensvej 40, 1871 Frederiksberg, Denmark

2. U.S. Geological Survey, Central Midwest Water Science Center, 400 South Clinton Street, Iowa City, Iowa 52240, United States

3. Department of Civil and Environmental Engineering, University of Iowa, 4105 Seamans Center, Iowa City, Iowa, 52242, United States

4. U.S. Geological Survey, Upper Midwest Water Science Center, 8505 Research Way, Middleton, WI 53562, USA

\*Corresponding author (jawameer.h@gmail.com) (+4571602448)

**Any use of trade, firm, or product names is for descriptive purposes only and does not imply endorsement by the U.S. Government**

#### **Supporting Information**

Supporting Information (62 pages) includes; experimental methods, 12 tables and 20 figures.

## The Contents

|                                                                           |    |
|---------------------------------------------------------------------------|----|
| Experimental methods.....                                                 | 8  |
| S1. Chemicals and Reagents.....                                           | 8  |
| S2. Additional Sampling .....                                             | 8  |
| S3. Sample Processing.....                                                | 9  |
| S3.1 Stream water extraction.....                                         | 9  |
| S3.2 Plant and soil extraction .....                                      | 10 |
| S4. Liquid Chromatography with Mass Spectrometry Analysis (LC-MS/MS)..... | 11 |
| S5. Method Validation .....                                               | 12 |
| Tables: .....                                                             | 13 |
| Figures: .....                                                            | 37 |
| References.....                                                           | 61 |

## Tables

|                                                                                                                                                                                                                                                                                                                                                                                                                         |    |
|-------------------------------------------------------------------------------------------------------------------------------------------------------------------------------------------------------------------------------------------------------------------------------------------------------------------------------------------------------------------------------------------------------------------------|----|
| Table S1. Physical-chemical properties of the investigated phytotoxins and herbicides. ....                                                                                                                                                                                                                                                                                                                             | 13 |
| Table S2. Retention time (Rt), precursor ions, quantification, and qualification ions for MS/MS parameters of selected phytotoxins and herbicides (atrazine and metolachlor). ....                                                                                                                                                                                                                                      | 15 |
| Table S3. Recovery, precision (RSDs) and matrix effects of the phytotoxins and herbicides (atrazine and metolachlor) in plant, soil and water.....                                                                                                                                                                                                                                                                      | 16 |
| Table S4. Multiple reaction monitoring (MRM) of phytotoxins and herbicides (atrazine and metolachlor) in standard solutions and samples (water samples from Clear Creek) analyzed during this study.....                                                                                                                                                                                                                | 18 |
| Table S5. The recovery (%) of phytotoxins and herbicides (atrazine and metolachlor) during their stability test of standards solution and soybean plant tissues extracts stored at room temperature, 5 °C (refrigerator) and -20 °C without exposing to sunlight for 90 days, and dried standards solution loaded on HLB SPE cartridges stored at room temperature without exposing to sunlight for 90 days.<br>a ..... | 22 |
| Table S6. Natural alkaloids, phytoestrogen, and herbicide concentrations, and streamflow for samples collected across Iowa and Illinois. [ng/L, nanograms per liter; Q, streamflow: m <sup>3</sup> /sec; cubic meter per second; nd, not detected; Parentheses indicate concentrations that are between the compound specific limit of detection (LOD) and limit of quantification (LOQ) values]. ....                  | 24 |
| Table S7. Statistical results (p-value and Spearman rho (rs) correlation coefficient) from the correlation of streamflow and compound concentration, and overall data (with streamflow, atrazine (the reference herbicide) and total herbicide concentration), data grouped by sampling site. A p-value <0.05 was considered statistically significant and is bolded and marked with an asterisk.....                   | 28 |
| Table S8. Natural alkaloids, phytoestrogen, and herbicide concentrations in upstream sites collected across Iowa on December 29, 2019. [ng/L, nanograms per liter; nd, not detected; parentheses indicate concentrations that are between the compound specific LOD and LOQ values]. ....                                                                                                                               | 30 |
| Table S9. Natural alkaloids, phytoestrogen, and herbicide concentrations in upstream sites collected at the effluent site of WWTP roughly 5.1 km upstream from the sampling point at Muddy Creek reference basin. [ng/L, nanograms per liter; nd, not detected].....                                                                                                                                                    | 32 |
| Table S10. Natural alkaloids, phytoestrogen, and herbicide concentrations in the side ditch site flowing through corn and soybean fields into Old Mans Creek near Iowa City, Iowa (05455100). [ng/L, nanograms per liter; nd, not detected; parentheses indicate concentrations that are between the compound specific LOD and LOQ values].....                                                                         | 33 |

Table S11. Natural alkaloids, phytoestrogen, and herbicide concentrations for soybean plant samples collected from the field of upstream from Clear Creek near Oxford in Iowa. [ng/g, nanograms per gram; nd, not detected]. .....34

Table S12. Natural alkaloids, phytoestrogen, and herbicide concentrations for soil samples collected from the field of upstream Clear Creek near Oxford in Iowa. [ng/g, nanograms per gram; nd, not detected]. Data are given as mean (n =2).....35

## Figures

Figure S1. Seasonal views for Clear Creek near Oxford, Iowa (05454220) showing the landscape upstream from the sampling location (left photos, J photo unavailable), and the stream at the sampling location (right photos) on the following dates and streamflow; (A) September 23, 2019 (1.1 m<sup>3</sup>/sec); (B) October 6, 2019 (2.4 m<sup>3</sup>/sec); (C) October 21, 2019 (1.0 m<sup>3</sup>/sec); (D) November 7, 2019 (0.7 m<sup>3</sup>/sec); (E) November 17, 2019 (0.7 m<sup>3</sup>/sec); (F) December 17, 2019 (0.5 m<sup>3</sup>/sec); (G) December 29, 2019 (2.8 m<sup>3</sup>/sec); (H) January 22, 2020 (streamflow data unavailable); (I) February 3, 2020 (streamflow data unavailable); and (J) March 10, 2020 (2.6 m<sup>3</sup>/sec). .....40

Figure S2. Location of sample collection upstream from (A) Clear Creek near Oxford in Iowa (05454220), (B) Old Mans Creek near Iowa City (05455100), and (C) West Branch Wapsinonoc Creek at West Branch, Iowa (0546494170), December 29, 2019. The green circles are the gaging station sites and the red circles are the upstream sites (UPS 1 to UPS 5) for all basins. ....41

Figure S3. Effluent from wastewater treatment plant approximately 5.1 km upstream from the sampling site at the Muddy Creek reference basin; samples were collected on November 8, 2019 and January 22, 2020. ....42

Figure S4. The side ditch site at the Old Mans Creek near Iowa City, Iowa (05455100); (A) the side ditch and (B) the ditch in relation to the field flowing through corn and soybean fields into the creek; samples were collected on November 21, 2019, and February 3, February 18 and March 10, 2020. ....43

Figure S5. Temporal variations of the field adjacent to Clear Creek upstream from Clear Creek near Oxford, IA (05454220), samples collected on (A) October 18, 2019, (B) November 19, 2019, (C) December 17, 2019, and (D) January 22, 2020. The soybean field was harvested on (E) November 7, 2019.....45

Figure S6. Demonstration of soil sampling using (A) the 12.7 cm metal pipe, and (B and C) soil sample collection in 500-mL polypropylene jars. The soil type of the field is Colo silt loam <sup>12</sup>.....46

Figure S7. Distribution of phytotoxins and herbicides concentration in the samples (n=72) at all stream sampling sites of Clear Creek (n=16), West Branch Wapsinonoc Creek (n=16), Old Mans Creek (n=16), Iowa River (n=3), and Mississippi River (n=5), collected from September 2019 to March 2020. Blue point, red star, and percentiles (listed along the x-axis) represent site specific mean, outliers, and detection frequencies, respectively. The red line indicates the method LOD in ng/L. Only concentrations above the LOD are shown in the figure, but all measurements were included in the calculation of detection frequencies provided along the x-axis. Note that y-axis is a logarithmic scale. Targeted compounds grouped with color; green for herbicides, blue for alkaloids, and orange for phytoestrogens. ....47

Figure S8. Concentrations of alkaloids, herbicides (atrazine and metolachlor), and streamflow for the samples (n=16) collected at West Branch Wapsinonoc Creek at West Branch, (0546494170),

September 2019 through March 2020.<sup>13</sup> Note that the y-axes (left) is in a logarithmic scale, and the shaded area is the harvest season in Iowa. ....48

Figure S9. Concentrations of alkaloids, herbicides (atrazine and metolachlor), and streamflow for the samples (n=16) collected at Old Mans Creek near Iowa City (05455100), September 2019 through March 2020.<sup>13</sup> In January and February, streamflow data were unavailable due to frozen conditions. Note that the y-axes (left) is in a logarithmic scale, and the shaded area is the harvest season in Iowa.....49

Figure S10. Concentrations of phytoestrogens, herbicides (atrazine and metolachlor), and streamflow for the samples (n=16) collected at Clear Creek, near Oxford, Iowa (05454220), September 2019 through March 2020.<sup>13</sup> In January and February, streamflow data were unavailable due to frozen condition. Note that the y-axes (left) is in a logarithmic scale, and the shaded area is the harvest season in Iowa. ....50

Figure S11. Concentrations of phytoestrogens, herbicides (atrazine and metolachlor), and streamflow for the samples (n=16) collected at West Branch Wapsinonoc Creek at West Branch, Iowa (0546494170), September 2019 through March 2020.<sup>13</sup> Note that the y-axes (left) is in a logarithmic scale, and the shaded area is the harvest season in Iowa.....51

Figure S12. Concentrations of phytoestrogens, herbicides (atrazine and metolachlor), and streamflow for the samples (n=16) collected at Old Mans Creek near Iowa City, Iowa (05455100), September 2019 through March 2020.<sup>13</sup> In January and February, streamflow data were unavailable due to frozen conditions. Note that the y-axes (left) is in a logarithmic scale, and the shaded area is the harvest season in Iowa. ....52

Figure S13. Concentrations of phytotoxins and herbicides (atrazine and metolachlor) for the samples collected during base-flow (n=5) and runoff events (n=11) at Clear Creek, near Oxford, Iowa (05454220), September 2019 through March 2020. Blue point, red star and percentiles (listed along the x-axes) represent site specific medians, outliers, and detection frequencies, respectively. Note that y-axes in a logarithmic scale. Targeted compounds are grouped by color; green for herbicides, blue for alkaloids, and orange for phytoestrogens. Only concentrations above the LOD are shown in the figure, but all measurements were included in the calculation of detection frequencies provided along the x-axes. ....53

Figure S14. Concentrations of phytotoxins and herbicides (atrazine and metolachlor) for the samples collected during base-flow (n=5) and runoff events (n=11) at West Branch Wapsinonoc Creek at West Branch, Iowa (0546494170), September 2019 through March 2020. Blue point, red star and percentiles (listed along the x-axes) represent site specific medians, outliers, and detection frequencies, respectively. Note that y-axes in a logarithmic scale. Targeted compounds are grouped by color; green for herbicides, blue for alkaloids, and orange for phytoestrogens. Only concentrations above the LOD are shown in the figure, but all measurements were included in the calculation of detection frequencies provided along the x-axes.....54

Figure S15. Concentrations of phytotoxins and herbicides (atrazine and metolachlor) for the samples collected during base-flow (n=5) and runoff events (n=11) at Old Mans Creek near Iowa City, Iowa (05455100), September 2019 through March 2020. Blue point, red star and percentiles (listed along the x-axes) represent site specific medians, outliers, and detection frequencies, respectively. Note that primary y-axes in a logarithmic scale. Targeted compounds are grouped by color; green for herbicides, blue for alkaloids, and orange for phytoestrogens. Only concentrations above the LOD are shown in the figure, but all measurements were included in the calculation of detection frequencies provided along the x-axes. ....55

Figure S16. Concentrations of alkaloids, phytoestrogens, and herbicides (atrazine, and metolachlor) for the samples (n=2) collected at West Branch Wapsinonoc Creek at West Branch, Iowa (0546494170), and upstream sites 1 and 2, December 29, 2019. Coordinates (latitude & longitude) and the distance of upstream sites from gaging station location of 41.670028, -91.344250, upstream site 1: 41.685093, -91.346531, 1.4 km; upstream site 2: 41.702671, -91.366165, 4.3 km. Note the split scale of the y-axes. ....56

Figure S17. Concentrations of alkaloids, phytoestrogens, and herbicides (atrazine, and metolachlor) for the samples (n=5) collected at the Old Mans Creek near Iowa City, Iowa (05455100), and upstream sites 1-5, December 29, 2019. Coordinates (latitude & longitude) and the distance of upstream sites from the gaging station location of 41.606497, -91.615656; upstream site 1: 41.608519, -91.638557, 2.9 km; upstream site 2: 41.604250, -91.709569, 12.0 km; upstream site 3: 41.601135, -91.751027, 16.6 km; upstream site 4: 41.603295, -91.829931, 27.1 km; upstream site 5: 41.622762, -91.992910, 43.7 km. ....57

Figure S18. Concentrations of phytotoxins, and herbicides (atrazine and metolachlor) for the samples collected during the storm events, and streamflow at Clear Creek near Oxford, Iowa (n=5), West Branch Wapsinonoc Creek at West Branch, Iowa (n=7), and Old Mans Creek (n=5) near Iowa City, Iowa, November 2019. ....58

Figure S19. Alkaloid and phytoestrogen concentrations (ng/g) in plant tissues sampled from a selected agricultural field in the Clear Creek Basin near Oxford, Iowa, collected monthly on October 18, November 19, December 17, 2019, and January 22, 2020. Data points are given as mean (n =2) and error bars indicate standard deviations. Note the split scale of the y-axes. ....59

Figure S20. Alkaloid and phytoestrogen concentrations (ng/g) in soils sampled from a selected agricultural field in the Clear Creek Basin near Oxford, Iowa, collected monthly on October 18, November 19, and December 17, 2019 and in January 22, 2020. Data points are given as mean of (n =2). Note that the y-axes is in a logarithmic scale. ....60

## Experimental methods

### S1. Chemicals and Reagents

Acetone (CAS: 67-64-1), ammonium formate ( $\text{NH}_4\text{HCO}_2$ ) (CAS: 540-69-2), formic acid (FA) (CAS: 64-18-6), methanol (MeOH) (CAS: 67-56-1), analytical standard of coumestrol (CAS: 479-13-0), daidzein (CAS: 486-66-8), daidzin (CAS: 552-66-9), equol (CAS: 531-95-3), genistein (CAS: 446-72-0), genistin (CAS: 529-59-9), flazin (CAS: 100041-05-2), indole-3-acetic acid (CAS: 87-51-4), indole-3-carboxylic acid (CAS: 771-50-6), tyramine (CAS: 51-67-2), trigonelline (CAS: 535-83-1 (anhydrous)), metolachlor (CAS: 51218-45-2), atrazine (CAS: 1912-24-9), prochloraz (internal standard for surrogate recovery) (CAS: 67747-09-5, prochloraz-d4), and caffeine (CAS: 58-08-2), purchased from Sigma-Aldrich (Darmstadt, Germany). Senecionine (internal standard, for spiking experiments and method validation) (CAS: 130-01-8) purchased from Phytolab (Vestenbergsgreuth, Germany) and Sigma-Aldrich (Darmstadt, Germany). Oasis MCX and HLB 6 cc, 150 mg Sorbent, 30  $\mu\text{m}$  particle size purchased from Waters (Milford, USA).

### S2. Additional Sampling

To investigate the spatial resolution and effects of vegetation area on stream-water quality, a synoptic sampling was conducted during runoff conditions in upstream sampling points at three basins in Iowa (Clear Creek (n=5), West Branch Wapsinonoc Creek (n=2), and Old Mans Creek (n=5)) on December 29, 2019. For this synoptic effort, samples were collected at the U.S. Geological Survey (USGS) gaging station (most downstream sampling site) and two farther upstream sampling sites (upstream 1 and 2) for West Branch Wapsinonoc Creek, and five upstream sampling sites (upstream 1 - 5) for both Clear Creek and Old Mans Creek progressively upstream from the gaging station (Figure S2). All of the upstream sampling sites still have soybean production; however, the number soybean fields in the contributing drainage area and streams sizes decreased substantially. In addition, to determine potential temporal variations in stream chemistry during storm events, at least 5 samples were collected over a storm hydrograph at the three basins (Clear Creek (n=5), West Branch Wapsinonoc Creek (n=7), and Old Mans Creek (n=5)) in Iowa, during a storm event in November 2019; about 31 mm precipitation was recorded.<sup>1</sup> To better understand potential sources of phytotoxins to streams, two effluent samples were collected from a wastewater treatment plant



(WWTP) roughly 5.1 km upstream of the sampling site at the Muddy Creek reference basin (Figure S3). To demonstrate the potential of the side ditch to transport the phytotoxins and herbicides, four water samples were collected from a side ditch flowing through corn and soybean fields that discharged just above the sampling site at Old Mans Creek (Figure S4).

To determine and understand phytotoxin concentrations in soybean plant tissue and soil, samples of soybean plant and soils were collected from a soybean field adjacent to Clear Creek upstream from the Clear Creek gaging station (Figure S5). Plant tissue (n=8), surface soil (n=8), and near-surface (~0-10 cm) soil (n=8) samples were collected (in triplicate) from the same locations (approximately 60-100 m away from the field edge, Figure S1.E) on a monthly schedule. The whole plant samples, including roots were collected on October 18, 2019 (pre-harvest). However, after harvesting the soybean field, plant tissues residue remaining on the field were collected as a plant sample on November 19, 2019 (post-harvest 1); December 17, 2019 (post-harvest 2); and January 22, 2020 (post-harvest 3). Roots were included with plant tissue samples collected on October and November but were not able to be obtained in December and January due to frozen soil conditions.

### **S3. Sample Processing**

#### **S3.1 Stream water extraction**

Stream water samples were processed using a previously described method.<sup>2</sup> In brief, water samples were filtered through a 0.7- $\mu$ m nominal pore size glass-fiber filter (GF/F) [Whatman] to remove any suspended particles. A 1.0-L water sample was measured volumetrically. The pH of the water samples were adjusted to 3 using buffer solution of formic acid and ammonium formate solution for proper retention during solid phase extraction (SPE). Water samples prior to February 2020 were extracted using SPE cartridges of Oasis<sup>®</sup> MCX and HLB (6 cc, 500mg; Waters Corporation, Milford, Massachusetts) for alkaloids and phytoestrogen, respectively. Water samples (1 L) were extracted with MCX and HLB simultaneously, both cartridges connected in series, where MCX cartridge connected to the sample manifold and HLB cartridge connected to MCX cartridge using cartridge adapters. Samples were pumped at a flow rate of 10 mL/min. Samples were spiked with the surrogate compound prochloraz-d4 (from Sigma-Aldrich, Darmstadt, Germany) at a concentration of 100 ng/L. For alkaloid extraction, the Oasis<sup>®</sup> MCX cartridge was eluted with 5 mL

of methanol and 10 mL of methanol–10% ammonia (3:1, v/v), respectively. For phytoestrogens, HLB cartridges were eluted with 5 mL of methanol and 10 mL of 50% methanol (1:1, v/v), respectively. The eluents of MCX and HLB cartridges were collected and combined in glass vials, then dried under nitrogen gas and stored in freezer at -20 °C prior to shipping. After February 2020, all water samples were extracted using only HLB cartridges, water samples were not loaded on two cartridges. Overall, the phytotoxins showed acceptable recovery (alkaloids: 96% using MCX cartridges and 90% using HLB cartridges; phytoestrogens 92% using HLB cartridges). The extracts were dried under a gentle stream of nitrogen in glass vials then shipped to the Department of Plant and Environmental Sciences, University of Copenhagen, Denmark, where extracts were reconstituted for analysis of the target compounds. Before analysis, the extracts were dissolved in 900 µL of methanol and spiked 100 µL with senecionine (100 ng/L) as an internal standard to account for potential matrix effects and instrument fluctuations.

### **S3.2 Plant and soil extraction**

Plant tissues (2 out of 3 collected samples) were extracted using a previously described method.<sup>3</sup> Plant samples were freeze-dried overnight using a lyophilizer. Dry biomass content was determined. methanol (MeOH)/water solution (1.0 mL, 1:1 ratio), 100 µL of surrogate compound prochloraz-d4 (a concentration of 100 ng/L), and a single stainless steel homogenization bead (5 mm) were added to freeze-dried plant tissues in a microcentrifuge tube, and then placed on a mixer mill (Retsch) for 5 min at 30 Hz, sonicated 10 min, vortexed for 1 min, then centrifuged for 10 min at 10,000 rpm (4000 *g*). The supernatant was removed with a needle syringe and filtered through a 0.22-µm polytetrafluoroethylene (PTFE) filter (Fisher) into a glass vial. The extraction procedure was repeated sequentially two additional times by adding a volume of 1.0 mL of the MeOH:water solution for each subsequent extraction and repeating the extraction procedure (i.e., homogenization, sonication, vortex, centrifugation, and filtration). All three fractions were combined and filtered with a 0.22 µm PTFE filter (Fisher), and then passed through MCX SPE as described in section S3.1 (Stream water extraction). Compounds were eluted from the cartridges into glass vial and dried under nitrogen gas, and then stored at -20 °C prior to shipping. A spike-recovery test of the sequential extraction procedure yielded 98 ± 3% recovery of prochloraz-d4.

Soil samples (2 out of 3 collected samples) were extracted using a previously described method.<sup>2</sup> Soil samples (2.5 g fresh weight) were weighed into a 25 mL centrifuge tube, then spiked with 100  $\mu$ L the surrogate compound prochloraz-d4 (at a concentration of 100 ng/L). MeOH (10 mL) was added to the tube, then the tube sonicated for 15 minutes and centrifuged for 10 min at 8000 rpm (2100 *g*). The supernatant was collected. This extraction was repeated. After that, 10 mL of MeOH:acetone (85: 15 v/v %) solvent was used for the third extraction. Finally, the three extracts were combined, centrifuged, and filtered with a 0.22  $\mu$ m PTFE filter (Fisher), and then passed through MCX SPE as described in section S3.1 (Stream water extraction). Compounds were eluted from the cartridges into glass vial and dried under nitrogen gas, and then stored at -20 °C prior to shipping.

#### **S4. Liquid Chromatography with Mass Spectrometry Analysis (LC-MS/MS)**

The analysis was performed on a Waters ACQUITY Ultra Performance Liquid Chromatography (UPLC) I-Class System coupled with a Xevo TQD Triple Quadrupole Mass Spectrometer (MS/MS) (Milford, Massachusetts, USA). The separation was performed using a 50 mm  $\times$  2.1 mm I.D., 1.7  $\mu$ m Waters Acquity UPLC HSS C18 Column at 35 °C. The mobile phase was composed of eluent A consisting of water and 0.1 % FA, and eluent B consisting of MeOH and 0.1 % FA. Gradient elution was used and programmed as follows: 90 % A from 0-4.0 min, 85 % A from 4.0 to 7.0 min, 80 % A from 7.0 to 8.0 min, 75 % A from 8.0 to 10.0 min, 50 % A from 10.0 to 15.0 min, 10 % A from 15.0 to 17.10 min, and 90 % A from 17.10 to 23.0 min. The flow rate was kept constant at 0.20 mL/min. The sample injection volume was 5  $\mu$ L. MS/MS conditions were electrospray (ESI) ionization, positive mode, desolvation gas was set to 992 L/h at 497 °C, source temperature was set to 148 °C, and the cone gas flow was set to 20 L/h. The optimum capillary voltage was 3.5 kV. The cone voltage and collision energy were set at different values for each compound; the cone voltage ranged from 15-40 V and the collision energy ranged from 25-45 eV (Table S2). Data were collected in the multiple-reaction-monitoring (MRM) mode (Table S2); chromatograms of standards solution and samples of selected phytotoxins and herbicides are listed in Table S4. A 7-point surrogate-normalized external calibration curve was used to account for surrogate recovery and matrix effects during ionization. Curves were obtained by plotting measured analyte peak areas/internal standard peak area against corresponding analyte concentrations/internal standard concentration in the extracted matrix.

Linear regression was performed for each curve. Due to lack of analytical standards of ginsenine and soyalkaloid A for quantification indole-3-acetic acid and indole-3-carboxylic acid were used, respectively.

## S5. Method Validation

Field and laboratory blanks were used to determine recovery and matrix effects. Field blanks of plants (freeze-dried powder plant tissue of grass), soils (collected at the garden Water Plant of the University of Iowa) and water (using organic-free water (Thomas Scientific)) were collected; also laboratory water blanks consisted of deionized water. Alkaloids, phytoestrogens, and herbicides were not detected in any of the field blanks, or below the limits of detection (LOD). A new set of standard solutions was prepared to evaluate matrix effects, which were calculated from the ratio of the mean peak area of an analyte in post-extraction spiked samples to the mean peak area of the same analyte in standard solutions. Two concentration levels (25 and 100 µg/L) of phytotoxins were tested in triplicate. For recovery, freeze-dried powder of narrow-leaved or blue lupine (*Lupinus angustifolius* L.) plant, sandy soil from Vejle (N55°41'54.1, E9°25'34.8) – Denmark, and deionized water were used to evaluate the extraction efficiency. The recovery was calculated by comparing the response of post-spiked solution with a pre-spiked extract using equation 1; the non-spiked extract was regarded as background extract and subtracted in the calculations (Table S3). For this study, surrogate recovery of prochloraz-d4 ranged from 82 to 96%. Data were not corrected for recovery and matrix effects. For testing the recovery of alkaloids, phytoestrogens, herbicides and the surrogate compound prochloraz-d4 spiked for laboratory water samples (n=3), and then analyzed for assessing their initial recovery. Using HLB cartridges, the mean recovery rate of surrogates (prochloraz-d4) in the blank water, soil, and plant were 96 ±8% (n=3), 89 ±6% (n=3) and 94 ±8% (n=3) respectively. Using MCX cartridges, the mean recovery for alkaloids was 96% from 94% to 103% with a relative standard deviation (RSD) of 3%; however, using HLB cartridges their mean recovery was 90% ranging from 88 to 97% with an RSD of 4%. The mean recovery for phytoestrogens was 92% (ranging from 89 to 97%) with an RSD of 4%. The mean recovery for herbicides was 98% (ranging from 90 to 102%) with an RSD of 4%.

$$\text{Recovery (\%)} = \left( \frac{(\text{pre-spiked extract}) - (\text{non-spiked extract})}{(\text{post-spiked extract}) - (\text{non-spiked extract})} \right) * 100 \quad \text{Eq 1}$$

Tables:

**Table S1. Physical-chemical properties of the investigated phytotoxins and herbicides.**

| Phytotoxins and herbicides | Molecular Structure <sup>a</sup>                                                    | Molecular Formula                                             | Molecular Weight [g/mol] | Log K <sub>ow</sub> | pK <sub>a</sub>  | Water solubility (g/L) |
|----------------------------|-------------------------------------------------------------------------------------|---------------------------------------------------------------|--------------------------|---------------------|------------------|------------------------|
| Coumestrol                 | 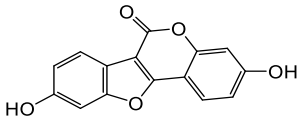   | C <sub>15</sub> H <sub>8</sub> O <sub>5</sub>                 | 268.2                    | 1.57 <sup>b</sup>   | 8.25             | 0.25 <sup>b</sup>      |
| Daidzein                   |    | C <sub>15</sub> H <sub>10</sub> O <sub>4</sub>                | 254.2                    | 2.55 <sup>b</sup>   | 7.2 <sup>d</sup> | 0.57 <sup>b</sup>      |
| Daidzin                    |   | C <sub>21</sub> H <sub>20</sub> O <sub>9</sub>                | 416.4                    | 0.54 <sup>b</sup>   | 6.9              | 3.20 <sup>b</sup>      |
| Equol                      |  | C <sub>15</sub> H <sub>14</sub> O <sub>3</sub>                | 242.3                    | 3.67 <sup>b</sup>   | 10 <sup>d</sup>  | 0.07 <sup>b</sup>      |
| Genistein                  |  | C <sub>15</sub> H <sub>10</sub> O <sub>5</sub>                | 270.2                    | 2.84 <sup>b</sup>   | 6.51             | 0.23 <sup>b</sup>      |
| Genistin                   |  | C <sub>21</sub> H <sub>20</sub> O <sub>10</sub>               | 432.4                    | 0.83 <sup>b</sup>   | 6.12             | 1.42 <sup>b</sup>      |
| Glycitin                   |  | C <sub>22</sub> H <sub>22</sub> O <sub>10</sub>               | 446.4                    | 0.10 <sup>b</sup>   | 9.6              | 4.88 <sup>b</sup>      |
| Flazin                     |  | C <sub>17</sub> H <sub>12</sub> N <sub>2</sub> O <sub>4</sub> | 308.3                    | 2.2 <sup>b</sup>    | 3.9              | 0.12 <sup>b</sup>      |
| Ginsenine                  |  | C <sub>13</sub> H <sub>13</sub> O <sub>2</sub> N <sub>2</sub> | 229.1                    | -8                  | -                | -                      |

|               |                                                                                   |                      |       |                    |                  |                      |
|---------------|-----------------------------------------------------------------------------------|----------------------|-------|--------------------|------------------|----------------------|
| Soyalkaloid A | 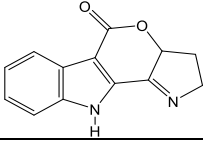 | $C_{13}H_{11}O_2N_2$ | 227.1 | -                  | -                | -                    |
| Trigonelline  |  | $C_7H_7NO_2$         | 137.1 | -2.53 <sup>b</sup> | 2.1              | 900 <sup>b</sup>     |
| Tyramine      |  | $C_8H_{11}NO$        | 137.2 | 0.86 <sup>b</sup>  | 9.6              | 616 <sup>b</sup>     |
| Atrazine      |  | $C_8H_{14}ClN_5$     | 215.7 | 2.61 <sup>c</sup>  | 1.7 <sup>f</sup> | 0.03 <sup>e, f</sup> |
| Metolachlor   |  | $C_{15}H_{22}ClNO_2$ | 283.8 | 3.13 <sup>c</sup>  | -                | 0.53 <sup>e, f</sup> |

a. Structures made in ChemDraw V.16.0.

b. calculation with EPI-WIN (version 4.11) ref. <sup>4</sup>

c. ref. <sup>5</sup>

d. ref. <sup>6</sup>

e. ref. <sup>7</sup>

f. ref. <sup>8</sup>

g. data not available

**Table S2. Retention time (Rt), precursor ions, quantification, and qualification ions for MS/MS parameters of selected phytotoxins and herbicides (atrazine and metolachlor).**

| phytotoxins                   | Rt<br>(min) | Precursor<br>ions<br>(m/z) | Quantification ions |        |         | Qualification ions |        |         |
|-------------------------------|-------------|----------------------------|---------------------|--------|---------|--------------------|--------|---------|
|                               |             |                            | MS/MS<br>(m/z)      | CV (V) | CE (eV) | MS/MS,<br>m/z      | CV (V) | CE (eV) |
| Coumestrol                    | 10.86       | 269.05                     | 213.05              | 30     | 35      | 197.0              | 30     | 45      |
| Daidzein                      | 8.84        | 255.06                     | 199.04              | 40     | 45      | 137.0              | 30     | 55      |
| Daidzin                       | 8.56        | 417.12                     | 255.07              | 15     | 25      | 223.0              | 25     | 35      |
| Equol                         | 9.97        | 243.10                     | 123.04              | 25     | 35      | 119.0              | 35     | 45      |
| Genistein                     | 8.62        | 271.06                     | 215.01              | 35     | 40      | 153.0              | 40     | 50      |
| Genistin                      | 9.36        | 431.09                     | 271.04              | 20     | 25      | 215.0              | 30     | 35      |
| Glycitin                      | 9.20        | 447.13                     | 382.95              | 30     | 35      | 322.0              | 30     | 45      |
| Flazin                        | 11.05       | 308.07                     | 247.10              | 30     | 35      | 236.0              | 30     | 40      |
| Ginsenine <sup>a</sup>        | 10.63       | 229.09                     | 169.12              | 30     | 30      | 115.0              | 30     | 35      |
| Soyalkaloid A <sup>a, b</sup> | 7.89        | 227.08                     | 219.00              | 30     | 30      | 203.0              | 30     | 35      |
| Trigonelline                  | 2.22        | 138.05                     | 94.06               | 25     | 30      | 120.0              | 30     | 35      |
| Tyramine                      | 1.29        | 138.00                     | 121.00              | 20     | 30      | 95.0               | 30     | 35      |
| Atrazine                      | 10.39       | 216.10                     | 174.05              | 35     | 40      | 138.0              | 35     | 50      |
| Metolachlor                   | 11.22       | 284.14                     | 252.11              | 25     | 35      | 176.0              | 30     | 40      |

The MS/MS parameters adapted from: a. ref <sup>9</sup> and b. ref <sup>10, 11</sup>.

**Table S3. Recovery, precision (RSDs) and matrix effects of the phytotoxins and herbicides (atrazine and metolachlor) in plant, soil and water.**

| Phytotoxins   | LOD    |         |        | LOQ     |         |        | Recovery% $\pm$ RSD |             |            | Matrix effect <sup>a</sup> |             |            |
|---------------|--------|---------|--------|---------|---------|--------|---------------------|-------------|------------|----------------------------|-------------|------------|
|               | Plant  | Soil    | Water  | Plant   | Soil    | Water  | Plant               | Soil        | Water      | Plant                      | Soil        | Water      |
|               | [ng/g] | [ng/kg] | [ng/L] | [ng/kg] | [ng/kg] | [ng/L] |                     |             |            |                            |             |            |
| Coumestrol    | 0.1    | 0.01    | 0.9    | 0.5     | 0.03    | 2.6    | 88 $\pm$ 7          | 89 $\pm$ 7  | 90 $\pm$ 6 | -10 $\pm$ 8                | 10 $\pm$ 7  | 8 $\pm$ 7  |
| Daidzein      | 1.0    | 0.06    | 1.0    | 4.5     | 0.1     | 3.3    | 80 $\pm$ 8          | 87 $\pm$ 8  | 88 $\pm$ 9 | -11 $\pm$ 6                | 15 $\pm$ 10 | 10 $\pm$ 8 |
| Daidzin       | 1.0    | 0.02    | 0.8    | 3.3     | 0.07    | 2.9    | 83 $\pm$ 7          | 90 $\pm$ 9  | 93 $\pm$ 5 | -9 $\pm$ 7                 | 9 $\pm$ 5   | 10 $\pm$ 8 |
| Equol         | 2.0    | 0.01    | 0.8    | 6.7     | 0.04    | 2.6    | 76 $\pm$ 7          | 83 $\pm$ 10 | 72 $\pm$ 7 | -8 $\pm$ 6                 | 17 $\pm$ 9  | 8 $\pm$ 6  |
| Genistein     | 0.2    | 0.02    | 0.8    | 2.1     | 0.05    | 3.1    | 70 $\pm$ 9          | 84 $\pm$ 10 | 70 $\pm$ 7 | -10 $\pm$ 8                | 16 $\pm$ 10 | 10 $\pm$ 8 |
| Genistin      | 1.0    | 0.08    | 0.6    | 4.1     | 0.12    | 2.7    | 87 $\pm$ 8          | 84 $\pm$ 90 | 93 $\pm$ 8 | -8 $\pm$ 6                 | 19 $\pm$ 6  | 9 $\pm$ 5  |
| Glycitin      | 1.0    | 0.05    | 0.5    | 3.6     | 0.11    | 2.7    | 70 $\pm$ 10         | 70 $\pm$ 8  | 74 $\pm$ 6 | -13 $\pm$ 10               | 11 $\pm$ 8  | 9 $\pm$ 7  |
| Flazin        | 0.5    | 0.01    | 1.1    | 2.7     | 0.03    | 3.1    | 89 $\pm$ 11         | 83 $\pm$ 13 | 90 $\pm$ 8 | -10 $\pm$ 9                | 12 $\pm$ 10 | 8 $\pm$ 6  |
| Ginsenine     | 1.2    | 0.01    | 1.0    | 5.1     | 0.04    | 3.7    | 87 $\pm$ 9          | 88 $\pm$ 9  | 92 $\pm$ 7 | -8 $\pm$ 8                 | 17 $\pm$ 8  | 10 $\pm$ 8 |
| Soyalkaloid A | 2.3    | 0.01    | 1.1    | 4.9     | 0.04    | 3.2    | 86 $\pm$ 6          | 89 $\pm$ 11 | 94 $\pm$ 6 | -8 $\pm$ 7                 | 11 $\pm$ 9  | 7 $\pm$ 6  |
| Trigonelline  | 1.4    | 0.02    | 1.0    | 4.1     | 0.05    | 2.9    | 76 $\pm$ 10         | 77 $\pm$ 8  | 73 $\pm$ 7 | -8 $\pm$ 7                 | 19 $\pm$ 6  | 9 $\pm$ 5  |



|                                    |     |      |     |     |      |     |       |       |       |       |      |      |
|------------------------------------|-----|------|-----|-----|------|-----|-------|-------|-------|-------|------|------|
| Tyramine                           | 1.2 | 0.05 | 1.1 | 3.4 | 0.09 | 2.8 | 87±10 | 89±10 | 82±8  | -10±5 | 10±5 | 10±6 |
| Atrazine                           | 0.2 | 0.02 | 0.3 | 1.2 | 0.05 | 2.0 | 91±9  | 90±13 | 90±8  | -10±9 | 9±6  | 11±5 |
| Metolachlor                        | 0.1 | 0.03 | 0.3 | 1.3 | 0.07 | 2.4 | 88±8  | 86±10 | 90±8  | -7±6  | 10±6 | 10±5 |
| Senecionine<br>(internal standard) | 5.5 | 0.06 | 5.0 | 3.1 | 0.12 | 11  | 86±6  | 89±6  | 90±8  | -8±7  | 10±5 | 8±4  |
| Prochloraz-<br>d4(surrogate)       | 1.4 | 0.02 | 1.2 | 3.1 | 0.08 | 3.7 | 89±8  | 86±10 | 94±11 | 9±7   | 8±4  | 7±4  |

a. Ion suppression(-) and enhancement ( no sign)

**Table S4. Multiple reaction monitoring (MRM) of phytotoxins and herbicides (atrazine and metolachlor) in standard solutions and samples (water samples from Clear Creek) analyzed during this study.**

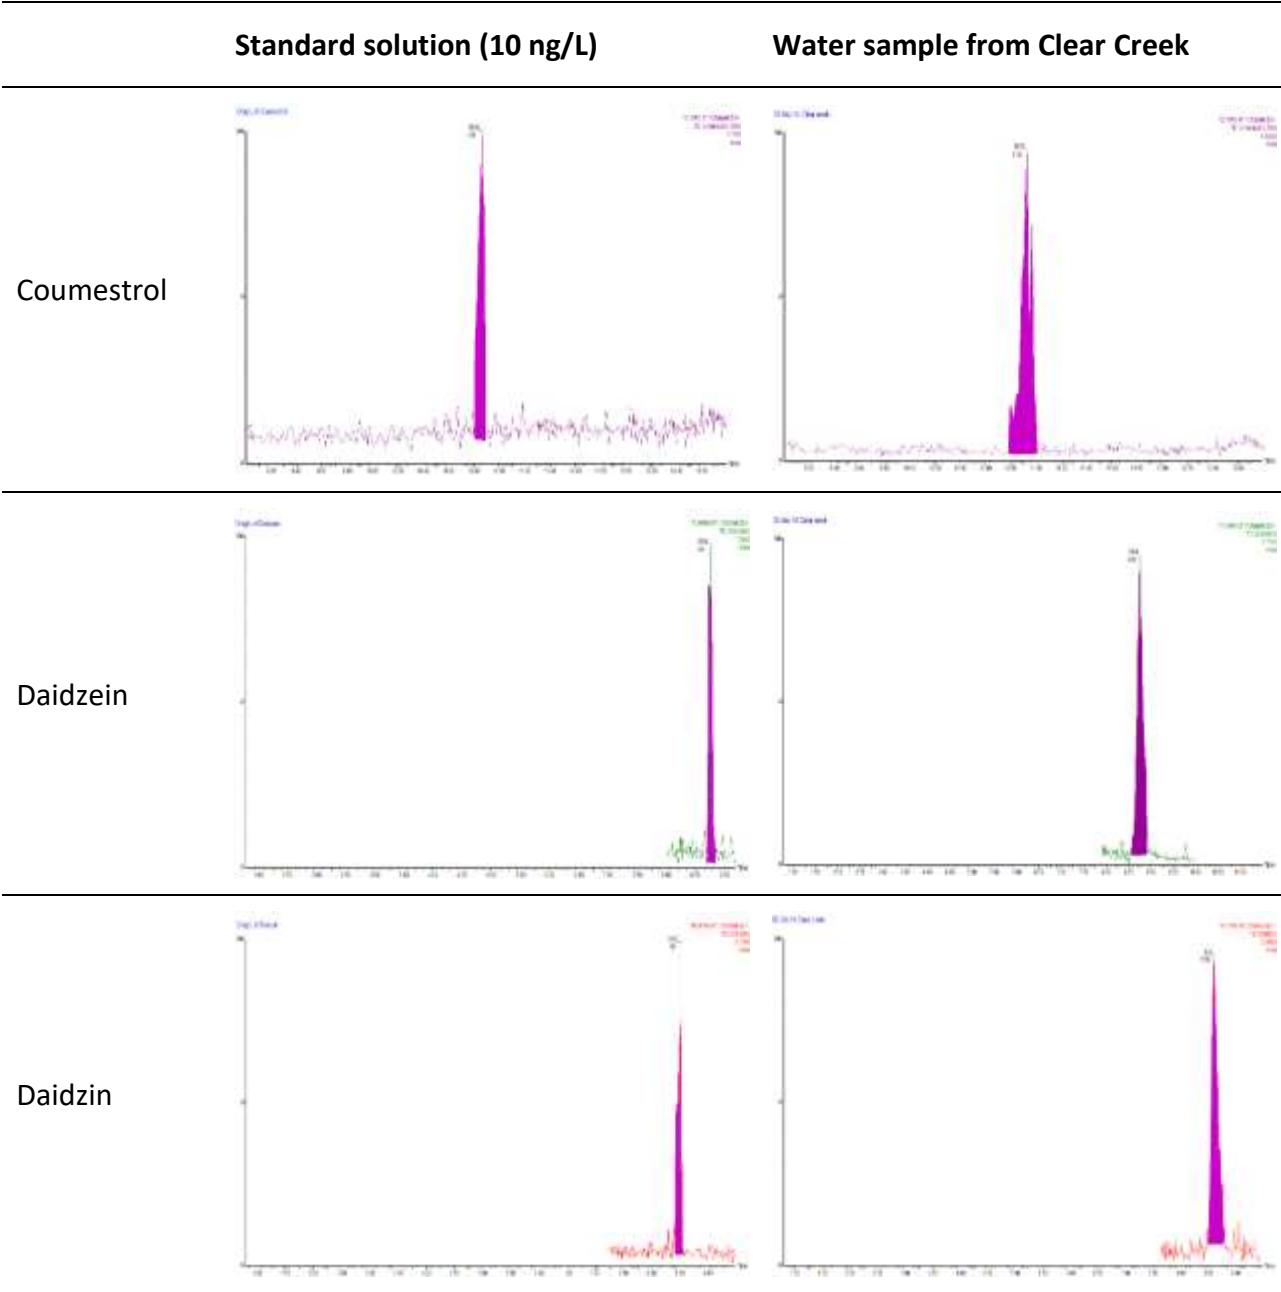

Equol

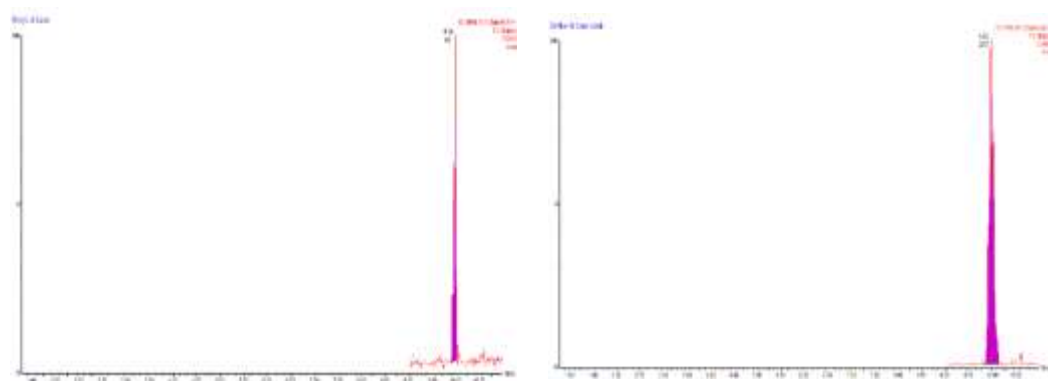

Genistein

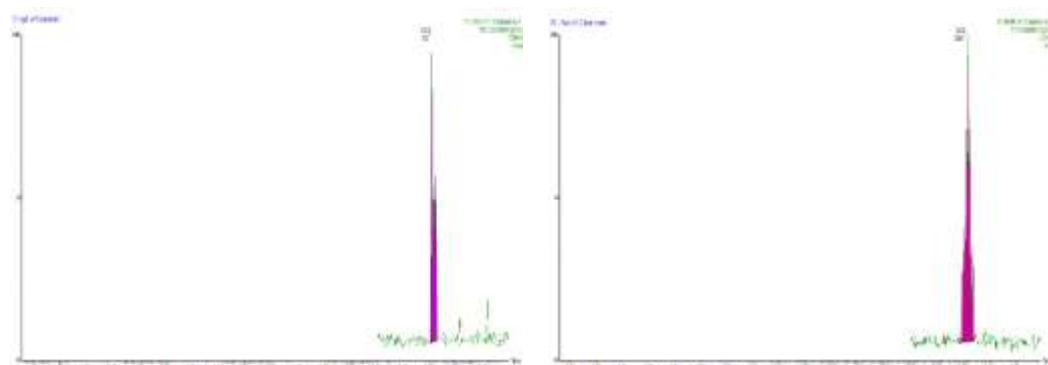

Genistin

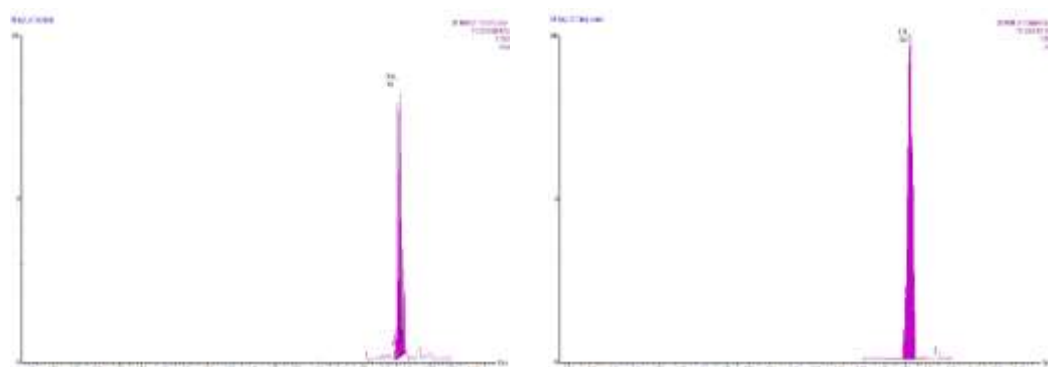

Glycitin

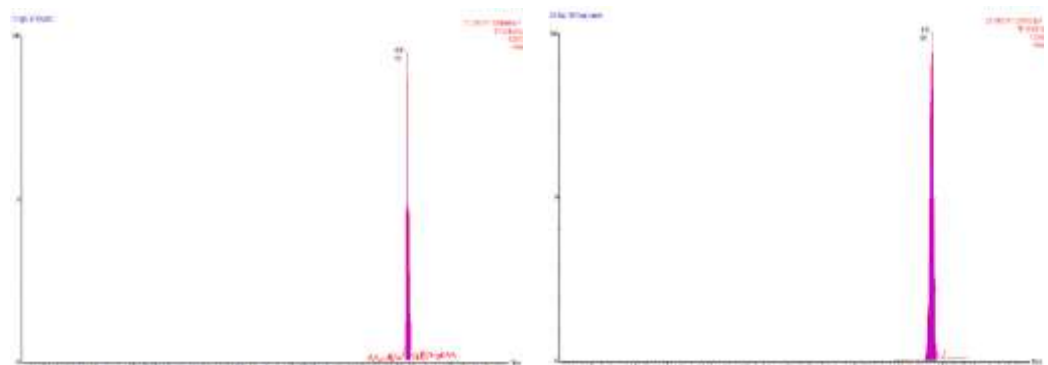

Two chromatograms are displayed side-by-side. The left chromatogram, titled 'Peak 1 (1.00)', shows a single sharp peak at approximately 1.00 minutes. The right chromatogram, titled 'Peak 2 (1.00)', also shows a single sharp peak at approximately 1.00 minutes. Both plots have 'Time (min)' on the x-axis and 'Intensity' on the y-axis.

Tyramine

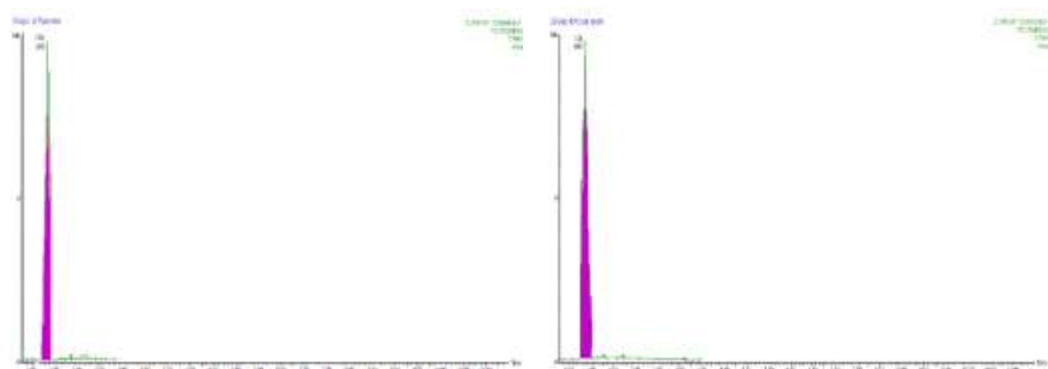

Atrazine

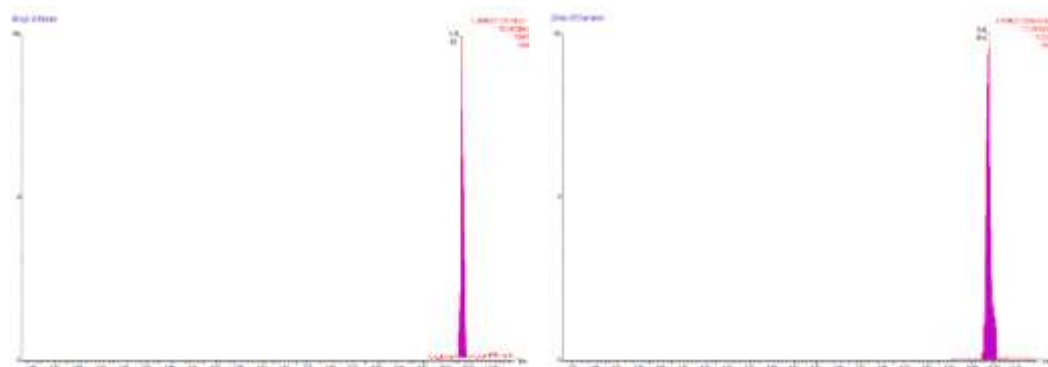

Metolachlor

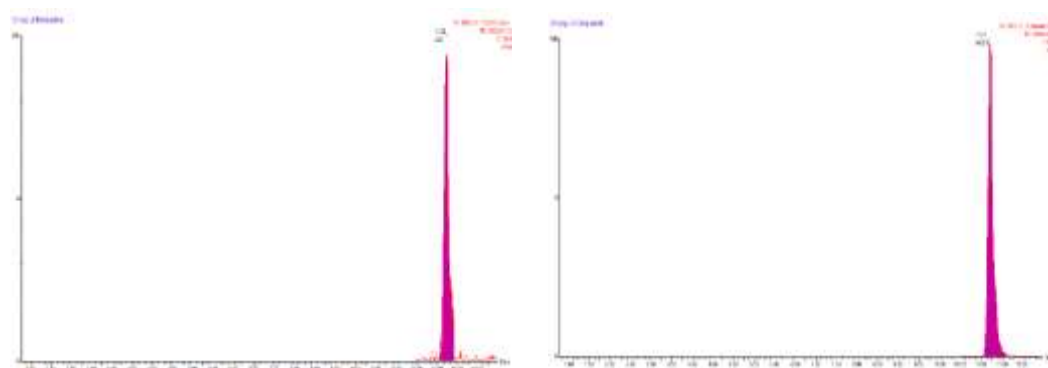

**Table S5. The recovery (%) of phytotoxins and herbicides (atrazine and metolachlor) during their stability test of standards solution and soybean plant tissues extracts stored at room temperature, 5 °C (refrigerator) and -20 °C without exposing to sunlight for 90 days, and dried standards solution loaded on HLB SPE cartridges stored at room temperature without exposing to sunlight for 90 days. <sup>a</sup>**

| phytotoxins | Standards solution <sup>b</sup> |      |        | Soybean plant tissues extract <sup>c</sup> |      |        | Standards solution loaded and dried on HLB SPE cartridges <sup>d</sup> |
|-------------|---------------------------------|------|--------|--------------------------------------------|------|--------|------------------------------------------------------------------------|
|             | Room temperature                | 5 °C | -20 °C | Room temperature                           | 5 °C | -20 °C |                                                                        |
| Coumestrol  | 93±3                            | 95±3 | 98±2   | 92±4                                       | 93±4 | 94±4   | 84±7                                                                   |
| Daidzein    | 94±2                            | 95±2 | 97±2   | 91±6                                       | 93±3 | 93±2   | 90±6                                                                   |
| Daidzin     | 94±4                            | 95±3 | 95±3   | 92±3                                       | 96±5 | 94±2   | 87±5                                                                   |
| Equol       | 95±3                            | 96±3 | 96±2   | ND                                         | ND   | ND     | 82±8                                                                   |
| Genistein   | 94±4                            | 94±1 | 97±2   | 90±5                                       | 92±5 | 95±3   | 88±6                                                                   |
| Genistin    | 95±4                            | 94±2 | 95±3   | 90±4                                       | 90±4 | 92±4   | 92±6                                                                   |
| Glycitin    | 93±5                            | 96±2 | 96±2   | ND                                         | ND   | ND     | 91±8                                                                   |
| Flazin      | 96±3                            | 95±3 | 98±1   | 92±5                                       | 93±5 | 93±5   | 87±5                                                                   |
| Ginsenine   | -                               | -    | -      | 93±6                                       | 95±3 | 94±3   | -                                                                      |

|               |      |      |      |      |      |      |      |
|---------------|------|------|------|------|------|------|------|
| Soyalkaloid A | -    | -    | -    | 94±5 | 93±4 | 95±5 | -    |
| Trigonelline  | 94±2 | 97±2 | 98±2 | 94±6 | 93±4 | 95±4 | 85±6 |
| Tyramine      | 96±2 | 96±4 | 97±3 | 92±5 | 92±6 | 93±4 | 90±5 |
| Atrazine      | 98±2 | 99±1 | 99±1 | ND   | ND   | ND   | 90±4 |
| Metolachlor   | 96±2 | 98±1 | 99±1 | 97±3 | 97±2 | 98±2 | 84±5 |

a. All of the solutions were dried under a gentle stream of nitrogen in glass vials.

b. A mixture of the standards solution (100 ng/L) was used.

c. 0.5 gram of soybean plant tissues extracted as described section 2.3 (Sample Processing) and section S3.2 (Plant and soil extraction) in SI.

d. A mixture of the standards solution (100 ng/L) was loaded on HLB SPE cartridges, as explained in section 2.3 (Sample Processing) and section S3.2 (Plant and soil extraction) in SI.

ND: not detected

- : data not available

**Table S6. Natural alkaloids, phytoestrogen, and herbicide concentrations, and streamflow for samples collected across Iowa and Illinois. [ng/L, nanograms per liter; Q, streamflow: m<sup>3</sup>/sec; cubic meter per second; nd, not detected; Parentheses indicate concentrations that are between the compound specific limit of detection (LOD) and limit of quantification (LOQ) values].**

| Site                                   | Date     | Q (m <sup>3</sup> /sec) | Concentration (ng/L) |          |         |       |           |          |          |        |             |               |              |          |          |             |
|----------------------------------------|----------|-------------------------|----------------------|----------|---------|-------|-----------|----------|----------|--------|-------------|---------------|--------------|----------|----------|-------------|
|                                        |          |                         | Coumestrol           | Daidzein | Daidzin | Equol | Genistein | Genistin | Glycitin | Flazin | Ginsenoside | Soyalkaloid A | Trigonelline | Tyramine | Atrazine | Metolachlor |
| Clear Creek<br>near<br>Oxford,<br>Iowa | 09/15/19 | 1.5                     | 5                    | nd       | nd      | nd    | 9         | (1)      | (2)      | 7      | 7           | 26            | nd           | nd       | 94       | 228         |
|                                        | 09/22/19 | 1.4                     | 4                    | 8        | nd      | nd    | 11        | (1)      | (2)      | 4      | nd          | 7             | 8            | nd       | 87       | 199         |
|                                        | 09/29/19 | 4.3                     | 11                   | 15       | nd      | nd    | 16        | 2        | (1)      | 11     | nd          | 8             | 7            | 6        | 80       | 412         |
|                                        | 10/03/19 | 2.9                     | nd                   | 14       | (2)     | nd    | 7         | nd       | nd       | nd     | nd          | nd            | 7            | 4        | 76       | 232         |
|                                        | 10/05/19 | 2.2                     | 12                   | 22       | 3       | nd    | 9         | nd       | nd       | nd     | 5           | nd            | nd           | 11       | 87       | 188         |
|                                        | 10/21/19 | 1.0                     | 6                    | 13       | nd      | nd    | 3         | nd       | (1)      | 6      | nd          | nd            | nd           | 12       | 71       | 73          |
|                                        | 11/07/19 | 0.7                     | nd                   | 18       | (2)     | nd    | 8         | nd       | (1)      | 5      | (3)         | 12            | 6            | nd       | 39       | 84          |
|                                        | 11/21/19 | 1.3                     | nd                   | nd       | nd      | nd    | 3         | nd       | nd       | 8      | 9           | 19            | (3)          | 10       | 58       | 55          |
|                                        | 11/27/19 | 0.9                     | 2                    | 11       | 3       | nd    | nd        | nd       | nd       | nd     | nd          | nd            | nd           | nd       | 34       | 41          |
|                                        | 11/30/19 | 1.0                     | nd                   | 39       | 5       | 7     | 3         | nd       | nd       | nd     | nd          | nd            | nd           | 8        | 78       | 113         |
|                                        | 12/17/19 | 0.5                     | nd                   | 7        | (2)     | (2)   | 7         | nd       | nd       | nd     | (3)         | 3             | nd           | 12       | 32       | 61          |
|                                        | 12/29/19 | 2.8                     | 2                    | nd       | nd      | nd    | 3         | nd       | nd       | nd     | 13          | 16            | 8            | 13       | 83       | 209         |
|                                        | 01/22/22 | 1.4                     | nd                   | (2)      | (2)     | nd    | nd        | nd       | nd       | 4      | nd          | 3             | 4            | (2)      | 46       | 63          |
|                                        | 02/03/20 | 1.4                     | nd                   | 3        | nd      | 19    | 8         | nd       | nd       | nd     | nd          | nd            | nd           | 4        | 22       | 62          |
|                                        | 02/18/20 | 1.4                     | 4                    | 8        | 4       | 9     | 4         | 2        | nd       | 4      | (3)         | (1)           | nd           | 6        | 100      | 219         |



|                                                               |                               |          |     |    |     |     |     |     |     |     |     |     |    |     |    |     |     |
|---------------------------------------------------------------|-------------------------------|----------|-----|----|-----|-----|-----|-----|-----|-----|-----|-----|----|-----|----|-----|-----|
| West Branch<br>Wapsinonoc<br>Creek<br>West<br>Branch,<br>Iowa | at                            | 03/10/20 | 2.9 | 3  | 4   | 3   | 68  | 12  | 2   | nd  | 8   | 6   | 6  | (2) | 5  | 258 | 208 |
|                                                               |                               | 09/15/19 | 0.5 | 4  | nd  | nd  | nd  | 9   | nd  | nd  | 13  | 8   | 15 | nd  | 7  | 129 | 163 |
|                                                               |                               | 09/22/19 | 0.2 | 8  | 10  | nd  | nd  | 7   | (1) | nd  | 14  | 10  | 12 | (3) | 10 | 126 | 340 |
|                                                               |                               | 09/29/19 | 0.4 | 13 | 12  | nd  | nd  | 8   | (1) | nd  | 10  | 8   | 14 | 4   | 12 | 92  | 199 |
|                                                               |                               | 10/03/19 | 0.2 | 6  | 18  | (2) | nd  | 9   | (1) | nd  | 10  | 6   | 28 | 4   | nd | 49  | 90  |
|                                                               |                               | 10/05/19 | 0.2 | 6  | 21  | 3   | nd  | 7   | nd  | nd  | 7   | nd  | nd | nd  | nd | 119 | 82  |
|                                                               |                               | 10/21/19 | 0.1 | 9  | 8   | nd  | nd  | nd  | nd  | (2) | nd  | nd  | nd | nd  | nd | 58  | 79  |
|                                                               |                               | 11/07/19 | 0.0 | nd | 8   | (1) | (3) | nd  | nd  | (1) | nd  | nd  | nd | nd  | nd | 37  | 69  |
|                                                               |                               | 11/21/19 | 0.2 | nd | 24  | nd  | nd  | nd  | (1) | nd  | 6   | nd  | nd | (3) | 13 | 51  | 82  |
|                                                               |                               | 11/26/19 | 0.1 | 7  | 14  | (2) | nd  | nd  | nd  | nd  | 9   | 5   | 4  | 4   | 15 | 46  | 78  |
|                                                               |                               | 11/30/19 | 0.1 | nd | nd  | nd  | nd  | nd  | nd  | nd  | nd  | nd  | nd | nd  | nd | 42  | 32  |
|                                                               |                               | 12/17/19 | 0.1 | nd | 3   | nd  | (1) | 3   | nd  | nd  | 4   | nd  | 6  | nd  | 8  | 36  | 35  |
|                                                               |                               | 12/29/19 | 0.4 | nd | 32  | 4   | 6   | nd  | nd  | nd  | 12  | 8   | 18 | nd  | 13 | 78  | 116 |
|                                                               |                               | 01/21/20 | 0.1 | nd | 3   | 3   | nd  | 6   | 2   | (1) | 8   | nd  | 6  | (2) | 6  | 74  | 71  |
|                                                               |                               | 02/03/20 | 0.2 | 1  | (2) | (1) | 25  | (2) | nd  | nd  | (3) | nd  | nd | nd  | 4  | 68  | 107 |
|                                                               |                               | 02/18/20 | 0.2 | 6  | 17  | (2) | 54  | 9   | 2   | nd  | 9   | (2) | 5  | (2) | 6  | 37  | 64  |
|                                                               |                               | 03/09/20 | 0.5 | 5  | 25  | (2) | 32  | 8   | (1) | nd  | 8   | (2) | 3  | (2) | 6  | 113 | 121 |
| Old<br>Creek<br>Iowa<br>Iowa                                  | Mans<br>near<br>City,<br>Iowa | 09/15/19 | 1.1 | 9  | nd  | nd  | nd  | 10  | 1   | (2) | 7   | 6   | 37 | nd  | nd | 74  | 76  |
|                                                               |                               | 09/23/19 | 4.3 | 9  | nd  | nd  | nd  | 9   | nd  | nd  | 14  | nd  | 4  | 7   | nd | 150 | 309 |
|                                                               |                               | 09/29/19 | 9.6 | nd | nd  | nd  | nd  | 6   | nd  | (1) | 10  | nd  | 4  | nd  | nd | 87  | 147 |
|                                                               |                               | 10/03/19 | 6.8 | nd | 8   | (1) | nd  | 3   | nd  | nd  | 9   | nd  | nd | nd  | 7  | 77  | 100 |
|                                                               |                               | 10/06/19 | 12  | 6  | 6   | (1) | nd  | 12  | 2   | nd  | nd  | nd  | nd | nd  | 8  | 88  | 76  |

|                                                    |          |      |    |     |     |     |     |     |     |     |     |    |     |    |     |     |
|----------------------------------------------------|----------|------|----|-----|-----|-----|-----|-----|-----|-----|-----|----|-----|----|-----|-----|
|                                                    | 10/21/19 | 2.3  | nd | 8   | nd  | nd | 6   | 7  | 74  | 59  |
|                                                    | 11/07/19 | 1.7  | 12 | 14  | (2) | 5   | nd  | nd  | (2) | nd  | nd  | 5  | 5   | 9  | 34  | 23  |
|                                                    | 11/21/19 | 2.2  | 17 | 26  | nd  | nd  | 3   | 2   | (1) | 10  | 14  | 21 | 6   | 11 | 29  | 50  |
|                                                    | 11/27/19 | 2.0  | nd | 16  | nd  | 5   | 10  | nd  | nd  | 7   | nd  | nd | nd  | nd | 88  | 45  |
|                                                    | 11/30/19 | 2.7  | 13 | 9   | 3   | nd  | 8   | nd  | nd  | 5   | 11  | 13 | nd  | 10 | 61  | 88  |
|                                                    | 12/17/19 | 1.6  | 7  | nd  | (2) | nd  | 3   | nd  | (1) | (3) | 6   | 7  | nd  | 11 | 78  | 81  |
|                                                    | 12/29/19 | 7.7  | nd | 25  | 3   | 8   | 22  | 3   | nd  | 7   | 10  | 12 | 5   | 36 | 92  | 119 |
|                                                    | 01/22/20 | 3.9  | 1  | 4   | 4   | nd  | 13  | 2   | nd  | 7   | nd  | 6  | (3) | 9  | 56  | 66  |
|                                                    | 02/03/20 | 3.9  | nd | 4   | nd  | 28  | nd  | 2   | nd  | nd  | (3) | 5  | nd  | 7  | 69  | 63  |
|                                                    | 02/18/20 | 3.9  | 3  | 18  | 2   | 14  | (1) | nd  | nd  | 8   | (2) | 4  | (1) | 7  | 52  | 226 |
|                                                    | 03/10/20 | 12   | 4  | 24  | 3   | 20  | 9   | nd  | nd  | 14  | (2) | 7  | nd  | 5  | 265 | 272 |
| Iowa River<br>at Wapello,<br>Iowa                  | 10/10/19 | 801  | 2  | (1) | nd  | (2) | nd  | nd  | nd  | nd  | nd  | nd | nd  | nd | 48  | 102 |
|                                                    | 12/18/19 | 229  | 2  | nd  | (1) | nd  | (2) | nd  | nd  | nd  | nd  | nd | nd  | nd | 72  | 172 |
|                                                    | 02/12/20 | 199  | 1  | nd  | (2) | nd  | nd  | (1) | nd  | nd  | nd  | nd | nd  | nd | 22  | 57  |
| Mississippi<br>River below<br>Grafton,<br>Illinois | 10/07/19 | 7476 | nd | nd  | nd  | nd  | 3   | nd  | nd  | nd  | nd  | nd | nd  | nd | 20  | 19  |
|                                                    | 11/04/19 | 7278 | nd | nd  | nd  | nd  | nd  | nd  | nd  | nd  | nd  | nd | nd  | nd | 23  | 26  |
|                                                    | 12/03/19 | 5437 | nd | nd  | (2) | nd  | 3   | nd  | nd  | nd  | nd  | nd | nd  | nd | 10  | 10  |
|                                                    | 01/05/20 | 4928 | nd | nd  | nd  | nd  | (1) | (1) | nd  | nd  | nd  | nd | nd  | nd | 7   | 11  |
|                                                    | 02/10/20 | 5522 | 1  | nd  | (1) | nd  | nd  | nd  | nd  | nd  | nd  | nd | nd  | nd | 43  | 24  |
| Muddy<br>Creek at<br>Coralville,<br>Iowa           | 09/15/19 | 3.5  | nd | nd  | nd  | nd  | nd  | nd  | nd  | nd  | nd  | nd | nd  | nd | 13  | nd  |
|                                                    | 09/22/19 | 2.1  | nd | nd  | nd  | nd  | nd  | nd  | nd  | nd  | nd  | nd | nd  | nd | 21  | nd  |
|                                                    | 09/29/19 | 1.1  | nd | nd  | nd  | nd  | nd  | nd  | nd  | nd  | nd  | nd | nd  | nd | 4   | nd  |

|          |     |    |    |    |    |    |    |    |    |    |    |    |    |    |    |    |
|----------|-----|----|----|----|----|----|----|----|----|----|----|----|----|----|----|----|
| 10/03/19 | 0.6 | nd | 5  | nd |
| 10/05/19 | 2.3 | nd | 4  | nd |
| 10/21/19 | 1.1 | nd | 8  | nd |
| 11/07/19 | 0.2 | nd | 8  | nd |
| 11/21/19 | 0.8 | nd | 3  | nd |
| 11/27/19 | 0.4 | nd | 4  | 3  |
| 11/30/19 | 0.4 | nd | 8  | nd |
| 12/17/19 | 0.1 | nd |
| 12/29/19 | 1.4 | nd | 11 | nd |
| 01/22/20 | 0.1 | nd | 9  | 4  |
| 02/03/20 | 0.3 | nd | 3  | nd |
| 02/18/20 | 0.2 | nd | 3  | 2  |
| 03/10/20 | 1.0 | nd | 6  | 2  |

Table S7. Statistical results (p-value and Spearman rho (rs) correlation coefficient) from the correlation of streamflow and compound concentration, and overall data (with streamflow, atrazine (the reference herbicide) and total herbicide concentration), data grouped by sampling site. A p-value <0.05 was considered statistically significant and is bolded and marked with an asterisk.

|                         |         | Streamflow vs<br>compound | Coumestrol | Daidzein | Daidzin | Equol | Genistein    | Genistin     | Glycitin     | Flazin       | Ginsene      | Soyalkaloid A | Trigonelline | Tyramine | Atrazine     | Metolachlor       |
|-------------------------|---------|---------------------------|------------|----------|---------|-------|--------------|--------------|--------------|--------------|--------------|---------------|--------------|----------|--------------|-------------------|
| Clear Creek             | rs      |                           | 0.47       | -0.11    | -0.19   | 0.04  | 0.51         | 0.52         | 0.12         | 0.27         | 0.13         | 0.16          | 0.48         | -0.01    | 0.63         | 0.79              |
|                         | p-value |                           | 0.06       | 0.69     | 0.47    | 0.88  | <b>0.04*</b> | <b>0.04*</b> | 0.66         | 0.32         | 0.63         | 0.55          | <b>0.06*</b> | 0.97     | <b>0.01*</b> | <b>&lt;0.001*</b> |
| West Branch             | rs      |                           | 0.10       | 0.38     | 0.07    | 0.11  | 0.51         | 0.36         | -0.57        | 0.62         | 0.57         | 0.46          | 0.23         | 0.33     | 0.63         | 0.76              |
| Wapsinonoc Creek        | p-value |                           | 0.71       | 0.14     | 0.80    | 0.68  | <b>0.05*</b> | 0.17         | <b>0.02*</b> | <b>0.01*</b> | <b>0.02*</b> | 0.07          | 0.39         | 0.21     | <b>0.01*</b> | <b>&lt;0.001*</b> |
| Old Mans Creek          | rs      |                           | -0.39      | -0.06    | 0.25    | 0.15  | 0.31         | 0.21         | -0.54        | 0.29         | -0.26        | -0.37         | -0.12        | -0.12    | 0.52         | 0.58              |
|                         | p-value |                           | 0.13       | 0.82     | 0.35    | 0.57  | 0.25         | 0.42         | <b>0.03*</b> | 0.27         | 0.32         | 0.16          | 0.66         | 0.67     | <b>0.04*</b> | <b>0.02*</b>      |
| Iowa River <sup>a</sup> | rs      |                           | 1.00       | 0.87     | -1.00   | -0.50 | 0.00         | -0.87        | -            | -            | -            | -             | -            | -        | 0.50         | 0.50              |
|                         | p-value |                           | 0.67       | 0.33     | 0.67    | 0.67  | 1.00         | 0.33         | -            | -            | -            | -             | -            | -        | 0.67         | 0.67              |
| Mississippi River       | rs      |                           | 0.00       | -        | -0.34   | -     | 0.15         | -0.71        | -            | -            | -            | -             | -            | -        | 0.60         | 0.60              |
|                         | p-value |                           | 1.00       | -        | 0.58    | -     | 0.80         | 0.18         | -            | -            | -            | -             | -            | -        | 0.28         | 0.28              |

|                                                                        |         |                   |                   |                   |              |                   |              |              |                   |                   |                   |                   |                   |          |                   |
|------------------------------------------------------------------------|---------|-------------------|-------------------|-------------------|--------------|-------------------|--------------|--------------|-------------------|-------------------|-------------------|-------------------|-------------------|----------|-------------------|
| Muddy Creek                                                            | rs      | -                 | -                 | -                 | -            | -                 | -            | -            | -                 | -                 | -                 | -                 | -                 | 0.34     | -0.48             |
|                                                                        | p-value | -                 | -                 | -                 | -            | -                 | -            | -            | -                 | -                 | -                 | -                 | -                 | 0.20     | 0.06              |
| Overall data vs streamflow, atrazine and total herbicide concentration |         |                   |                   |                   |              |                   |              |              |                   |                   |                   |                   |                   |          |                   |
|                                                                        |         | Coumestrol        | Daidzein          | Daidzin           | Equol        | Genistein         | Genistin     | Glycitin     | Flazin            | Ginsanine         | Soyalkaloid A     | Trigonelline      | Tyramine          | Atrazine | Metolachlor       |
| Streamflow                                                             | rs      | -0.05             | -0.12             | 0.15              | 0.22         | 0.25              | 0.24         | -0.06        | -0.06             | -0.04             | -0.02             | 0.03              | -0.02             | 0.17     | 0.16              |
|                                                                        | p-value | 0.68              | 0.33              | 0.21              | <b>0.07*</b> | <b>0.04*</b>      | <b>0.04*</b> | 0.61         | 0.62              | 0.75              | 0.88              | 0.79              | 0.88              | 0.15     | 0.17              |
| Atrazine                                                               | rs      | 0.55              | 0.52              | 0.33              | 0.19         | 0.68              | 0.32         | 0.18         | 0.67              | 0.47              | 0.52              | 0.34              | 0.47              | -        | 0.88              |
|                                                                        | p-value | <b>&lt;0.001*</b> | <b>&lt;0.001*</b> | <b>0.01*</b>      | 0.11         | <b>&lt;0.001*</b> | <b>0.01*</b> | 0.12         | <b>&lt;0.001*</b> | <b>&lt;0.001*</b> | <b>&lt;0.001*</b> | <b>&lt;0.001*</b> | <b>&lt;0.001*</b> | -        | <b>&lt;0.001*</b> |
| Total herbicides                                                       | rs      | 0.57              | 0.55              | 0.34              | 0.22         | 0.61              | 0.30         | 0.25         | 0.70              | 0.48              | 0.46              | 0.23              | 0.56              | -        | -                 |
|                                                                        | p-value | <b>&lt;0.001*</b> | <b>&lt;0.001*</b> | <b>&lt;0.001*</b> | <b>0.05*</b> | <b>&lt;0.001*</b> | <b>0.01*</b> | <b>0.03*</b> | <b>&lt;0.001*</b> | <b>&lt;0.001*</b> | <b>&lt;0.001*</b> | <b>0.04*</b>      | <b>&lt;0.001*</b> | -        | -                 |

\* Indicates a statistically significant result.

**Table S8. Natural alkaloids, phytoestrogen, and herbicide concentrations in upstream sites collected across Iowa on December 29, 2019. [ng/L, nanograms per liter; nd, not detected; parentheses indicate concentrations that are between the compound specific LOD and LOQ values].**

| Site                          | Upstream sites      | Coordinates (latitude & longitude) and the distance from the gaging station | Concentration (ng/L) |          |         |       |           |          |          |        |         |               |              |          |          |             |
|-------------------------------|---------------------|-----------------------------------------------------------------------------|----------------------|----------|---------|-------|-----------|----------|----------|--------|---------|---------------|--------------|----------|----------|-------------|
|                               |                     |                                                                             | Coumestrol           | Daidzein | Daidzin | Equol | Genistein | Genistin | Glycitin | Flazin | Ginsene | Soyalkaloid A | Trigonelline | Tyramine | Atrazine | Metolachlor |
| Clear Creek near Oxford, Iowa | Gaging station site | 41.718242, -91.740265                                                       | 2                    | nd       | nd      | 17    | 3         | nd       | nd       | 3      | 13      | 16            | 8            | 13       | 83       | 209         |
|                               | Upstream 1          | 41.711915, -91.798794, 7.3 km                                               | 2                    | nd       | nd      | 4     | 2         | nd       | nd       | 6      | 7       | 8             | 5            | 9        | 70       | 177         |
|                               | Upstream 2          | 41.705306, -91.852911, 13.0 km                                              | nd                   | nd       | nd      | nd    | nd        | nd       | nd       | 7      | 4       | 7             | 6            | 7        | 65       | 162         |
|                               | Upstream 3          | 41.716657, -91.890791, 16.1 km                                              | nd                   | nd       | nd      | nd    | nd        | nd       | nd       | 2      | 7       | 9             | 5            | 3        | 47       | 86          |
|                               | Upstream 4          | 41.713941, -91.929747, 20.2 km                                              | nd                   | nd       | nd      | nd    | nd        | nd       | nd       | 3      | 4       | 7             | nd           | nd       | 53       | 86          |
|                               | Upstream 5          | 41.714940, -91.968588, 23.7 km                                              | nd                   | nd       | nd      | nd    | nd        | nd       | nd       | 7      | nd      | nd            | nd           | nd       | 54       | 59          |

|                                                                     |                        |                                    |    |    |    |    |    |     |    |    |    |    |    |    |    |     |
|---------------------------------------------------------------------|------------------------|------------------------------------|----|----|----|----|----|-----|----|----|----|----|----|----|----|-----|
| West<br>Branch<br>Wapsinonoc<br>Creek at<br>West<br>Branch,<br>Iowa | Gaging<br>station site | 41.606497, -<br>91.615656          | nd | 25 | 3  | 8  | 22 | 3   | nd | 7  | 10 | 12 | 5  | 36 | 92 | 119 |
|                                                                     | Gaging<br>station site | 41.670028, -<br>91.344250          | nd | 32 | 4  | 11 | nd | nd  | nd | 12 | 8  | 18 | nd | 13 | 78 | 116 |
|                                                                     | Upstream 1             | 41.685093, -<br>91.346531, 1.4 km  | nd | 13 | 6  | 4  | nd | nd  | nd | 4  | 7  | 16 | nd | 22 | 96 | 74  |
|                                                                     | Upstream 2             | 41.702671, -<br>91.366165, 4.3 km  | nd | 27 | 4  | nd | nd | nd  | nd | 12 | 9  | 20 | nd | 8  | 86 | 69  |
| Old Mans<br>Creek near<br>Iowa City,<br>Iowa                        | Upstream 1             | 41.608519, -<br>91.638557, 2.9 km  | nd | 16 | 2  | 5  | 10 | (1) | nd | 7  | 7  | 8  | 6  | 25 | 73 | 72  |
|                                                                     | Upstream 2             | 41.604250, -<br>91.709569, 12.0 km | 2  | 9  | 1  | 3  | 11 | (1) | nd | 7  | 6  | 7  | 6  | 23 | 70 | 60  |
|                                                                     | Upstream 3             | 41.601135, -<br>91.751027, 16.6 km | 13 | 6  | nd | nd | 15 | (2) | nd | 3  | 8  | 10 | 7  | 15 | 48 | 14  |
|                                                                     | Upstream 4             | 41.603295, -<br>91.829931, 27.1 km | 1  | nd | nd | nd | 3  | nd  | nd | 2  | 4  | 10 | nd | 3  | 42 | 21  |
|                                                                     | Upstream 5             | 41.622762, -<br>91.992910, 43.7 km | nd | nd | nd | nd | 3  | nd  | nd | nd | 3  | 11 | nd | nd | 33 | 20  |

**Table S9. Natural alkaloids, phytoestrogen, and herbicide concentrations in upstream sites collected at the effluent site of WWTP roughly 5.1 km upstream from the sampling point at Muddy Creek reference basin. [ng/L, nanograms per liter; nd, not detected].**

| Date       | Concentration (ng/L) |          |         |       |           |          |          |        |         |               |              |          |          |             |
|------------|----------------------|----------|---------|-------|-----------|----------|----------|--------|---------|---------------|--------------|----------|----------|-------------|
|            | Coumestrol           | Daidzein | Daidzin | Equol | Genistein | Genistin | Glycitin | Flazin | Ginsene | Soyalkaloid A | Trigonelline | Tyramine | Atrazine | Metolachlor |
| 11/08/2019 | nd                   | nd       | nd      | nd    | nd        | nd       | nd       | nd     | nd      | nd            | nd           | nd       | 2        | nd          |
| 01/22/2020 | nd                   | nd       | nd      | nd    | nd        | nd       | nd       | nd     | nd      | nd            | nd           | nd       | 6        | nd          |



**Table S10. Natural alkaloids, phytoestrogen, and herbicide concentrations in the side ditch site flowing through corn and soybean fields into Old Mans Creek near Iowa City, Iowa (05455100). [ng/L, nanograms per liter; nd, not detected; parentheses indicate concentrations that are between the compound specific LOD and LOQ values].**

| Date       | Concentration (ng/L) |          |         |       |           |          |          |        |           |               |              |          |          |             |
|------------|----------------------|----------|---------|-------|-----------|----------|----------|--------|-----------|---------------|--------------|----------|----------|-------------|
|            | Coumestrol           | Daidzein | Daidzin | Equol | Genistein | Genistin | Glycitin | Flazin | Ginsanine | Soyalkaloid A | Trigonelline | Tyramine | Atrazine | Metolachlor |
| 11/21/2019 | nd                   | 51       | 7       | nd    | (2)       | 3        | nd       | 32     | 13        | 22            | 13           | nd       | 33       | 17          |
| 02/03/2020 | nd                   | nd       | nd      | (2)   | (1)       | nd       | nd       | nd     | nd        | nd            | nd           | 5        | 14       | 11          |
| 02/18/2020 | 2                    | 3        | (1)     | (2)   | nd        | 4        | nd       | (2)    | nd        | 2             | (1)          | 4        | 15       | 14          |
| 03/10/2020 | 1                    | 4        | (1)     | (1)   | nd        | (2)      | nd       | (2)    | nd        | 2             | nd           | 4        | 43       | 29          |

**Table S11. Natural alkaloids, phytoestrogen, and herbicide concentrations for soybean plant samples collected from the field of upstream from Clear Creek near Oxford in Iowa. [ng/g, nanograms per gram; nd, not detected].**

| Date       | Duplicate | Concentration (ng/g) in dried weight |                     |         |       |                     |          |          |        |           |               |                     |          |          |             |
|------------|-----------|--------------------------------------|---------------------|---------|-------|---------------------|----------|----------|--------|-----------|---------------|---------------------|----------|----------|-------------|
|            |           | Coumestrol                           | Daidzein            | Daidzin | Equol | Genistein           | Genistin | Glycitin | Flazin | Ginsanine | Soyalkaloid A | Trigonelline        | Tyramine | Atrazine | Metolachlor |
| 10/18/2019 | 1         | 5.7×10 <sup>3</sup>                  | 2.5×10 <sup>3</sup> | 596     | 3     | 1.9×10 <sup>3</sup> | nd       | 171      | 43     | 23        | 22            | 3.1×10 <sup>3</sup> | 126      | nd       | 3           |
|            | 2         | 8.9×10 <sup>3</sup>                  | 2.9×10 <sup>3</sup> | 870     | 4     | 2.2×10 <sup>3</sup> | nd       | 195      | 79     | 32        | 14            | 3.4×10 <sup>3</sup> | 81       | nd       | 2           |
| 11/19/2019 | 1         | 1.5×10 <sup>3</sup>                  | 2.1×10 <sup>3</sup> | 24      | 3     | 432                 | nd       | 9        | 125    | 43        | 12            | 1.8×10 <sup>3</sup> | 77       | nd       | 2           |
|            | 2         | 2.8×10 <sup>3</sup>                  | 100                 | 192     | 2     | 1.2×10 <sup>3</sup> | nd       | 31       | 51     | 30        | 10            | 15×10 <sup>3</sup>  | 49       | nd       | 1           |
| 12/17/2019 | 1         | 2.5×10 <sup>3</sup>                  | 673                 | 30      | nd    | 680                 | nd       | 4        | 35     | 248       | 12            | 1.0×10 <sup>3</sup> | 426      | nd       | 1           |
|            | 2         | 1.6×10 <sup>3</sup>                  | 632                 | 28      | nd    | 602                 | nd       | 4        | 23     | 167       | 11            | 1.3×10 <sup>3</sup> | 276      | nd       | 1           |
| 1/22/2020  | 1         | 915                                  | 105                 | nd      | nd    | 1653                | 19       | 11       | 13     | 111       | 5             | 1.1×10 <sup>3</sup> | 33       | nd       | nd          |
|            | 2         | 1.5×10 <sup>3</sup>                  | 84                  | nd      | nd    | 1411                | 11       | 8        | 10     | 83        | 6             | 882                 | 26       | nd       | nd          |

**Table S12. Natural alkaloids, phytoestrogen, and herbicide concentrations for soil samples collected from the field of upstream Clear Creek near Oxford in Iowa. [ng/g, nanograms per gram; nd, not detected]. Data are given as mean (n =2).**

| Date       | Duplicate | Soil type    | Concentration (ng/g) in fresh weight |          |         |       |           |          |          |        |           |               |              |          |          |             |
|------------|-----------|--------------|--------------------------------------|----------|---------|-------|-----------|----------|----------|--------|-----------|---------------|--------------|----------|----------|-------------|
|            |           |              | Coumestrol                           | Daidzein | Daidzin | Equol | Genistein | Genistin | Glycitin | Flazin | Ginsenine | Soyalkaloid A | Trigonelline | Tyramine | Atrazine | Metolachlor |
| 10/18/2019 | 1         | Surface soil | 3.43                                 | 2.62     | nd      | nd    | 0.86      | nd       | nd       | 1.44   | 0.56      | 0.56          | 1.04         | 2.45     | 0.73     | 2.23        |
| 11/19/2019 |           |              | 0.28                                 | 0.69     | nd      | nd    | 0.23      | nd       | nd       | 0.15   | 0.15      | 0.15          | 0.27         | 0.51     | 0.37     | 0.30        |
| 12/17/2019 |           |              | 0.44                                 | 0.49     | 0.02    | nd    | 1.30      | nd       | nd       | 0.11   | 0.11      | 0.10          | 0.74         | 1.14     | 0.18     | 0.23        |
| 1/22/2020  |           |              | 0.61                                 | 0.39     | nd      | nd    | 1.04      | nd       | nd       | 0.10   | 0.08      | 0.07          | 0.59         | 0.91     | 0.15     | 0.19        |
| 10/18/2019 | 2         | Surface soil | 0.23                                 | 2.31     | nd      | 0.14  | 0.76      | nd       | nd       | 0.49   | 0.49      | 0.49          | 0.91         | 1.91     | 0.95     | 1.53        |
| 11/19/2019 |           |              | 0.01                                 | 0.73     | nd      | nd    | 0.24      | nd       | nd       | 0.40   | 0.16      | 0.15          | 0.29         | 0.71     | 0.43     | 0.62        |
| 12/17/2019 |           |              | 0.06                                 | 0.64     | nd      | nd    | 0.21      | nd       | nd       | 0.13   | 0.12      | 0.13          | 0.25         | 0.63     | 0.28     | 0.73        |
| 1/22/2020  |           |              | 0.06                                 | 0.56     | nd      | nd    | 0.19      | nd       | nd       | 0.12   | 0.12      | 0.11          | 0.22         | 0.56     | 0.26     | 0.65        |

|            |   |                         |      |      |      |      |      |    |    |      |      |      |      |      |      |      |
|------------|---|-------------------------|------|------|------|------|------|----|----|------|------|------|------|------|------|------|
| 10/18/2019 | 1 | Near<br>surface<br>soil | 0.28 | 0.20 | nd   | 0.01 | 0.07 | nd | nd | 0.05 | 0.04 | 0.04 | 0.08 | 0.21 | 0.10 | 0.44 |
| 11/19/2019 |   |                         | 0.07 | 0.08 | nd   | nd   | 0.03 | nd | nd | 0.04 | 0.02 | 0.01 | 0.03 | 0.07 | 0.03 | 0.15 |
| 12/17/2019 |   |                         | 0.01 | 0.07 | nd   | nd   | 0.02 | nd | nd | 0.01 | 0.01 | 0.02 | 0.03 | 0.06 | 0.02 | 0.05 |
| 1/22/2020  |   |                         | 0.01 | 0.06 | nd   | nd   | 0.02 | nd | nd | 0.01 | 0.02 | 0.02 | 0.02 | 0.05 | 0.02 | 0.04 |
| 10/18/2019 | 2 | Near<br>surface<br>soil | 0.02 | 0.22 | 0.12 | nd   | 0.07 | nd | nd | 0.05 | 0.04 | 0.05 | 0.09 | 0.17 | 0.15 | 0.23 |
| 11/19/2019 |   |                         | 0.07 | 0.08 | nd   | nd   | 0.03 | nd | nd | 0.02 | 0.01 | 0.02 | 0.03 | 0.08 | 0.05 | 0.06 |
| 12/17/2019 |   |                         | 0.07 | 0.07 | nd   | nd   | 0.06 | nd | nd | 0.03 | 0.02 | 0.01 | 0.03 | 0.28 | 0.03 | 0.03 |
| 1/22/2020  |   |                         | 0.06 | 0.07 | nd   | nd   | 0.07 | nd | nd | 0.02 | 0.01 | 0.01 | 0.03 | 0.25 | 0.02 | 0.03 |

Figures:

A

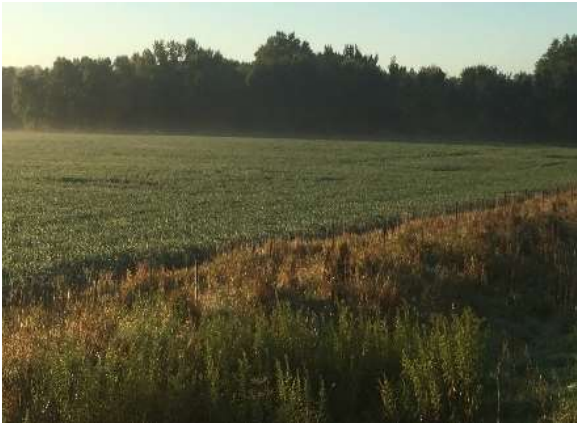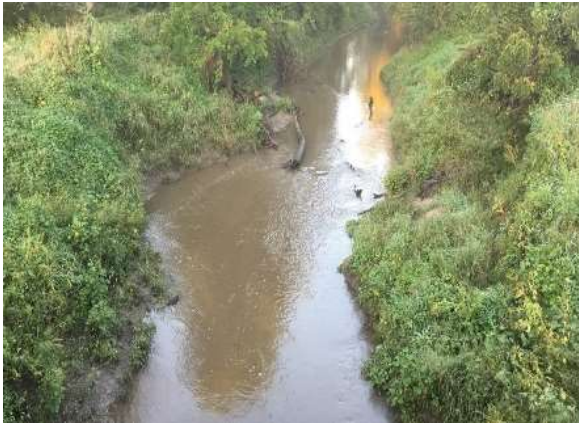

B

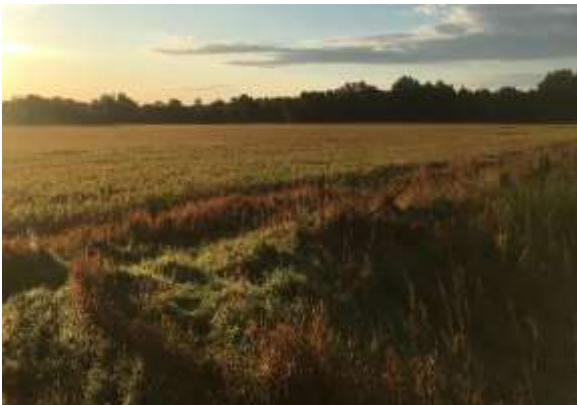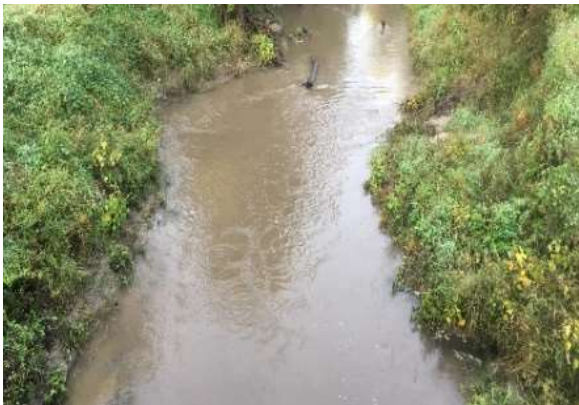

C

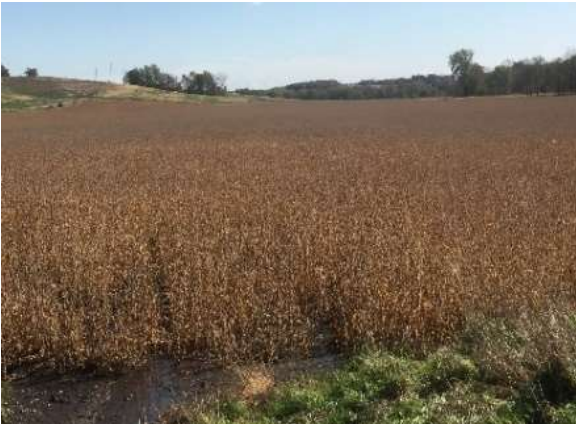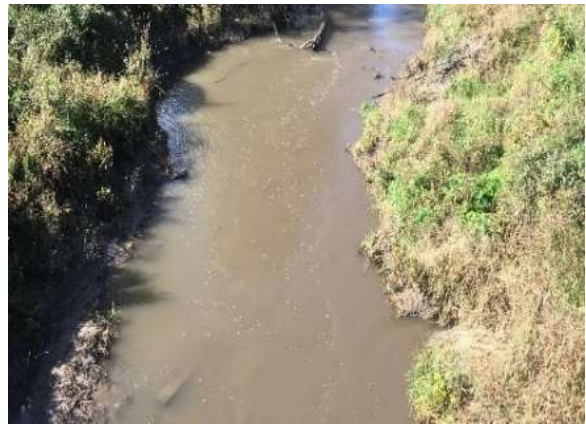

D

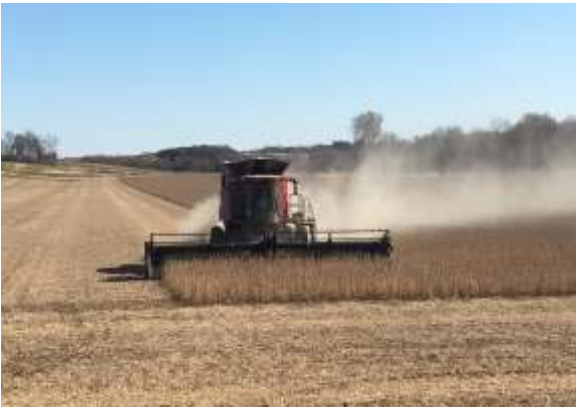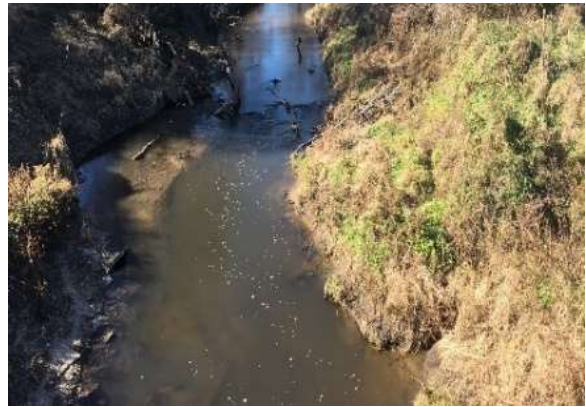

E

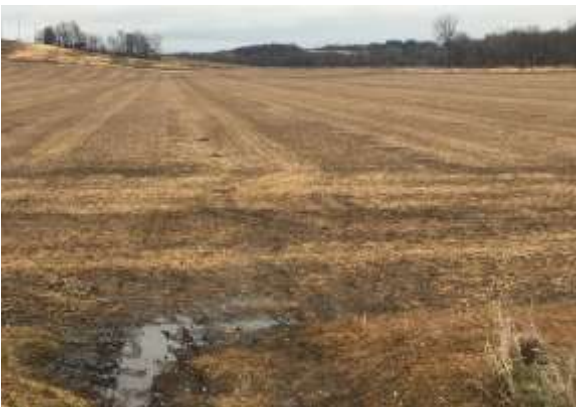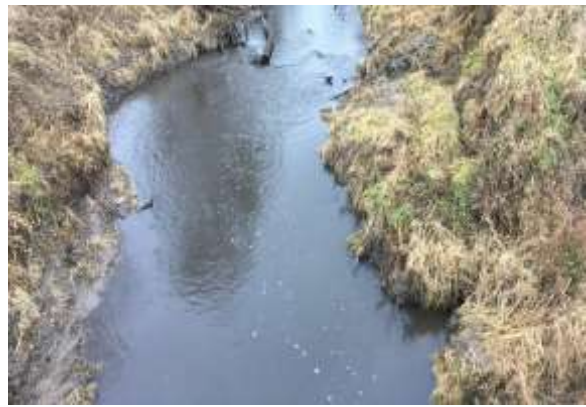



F

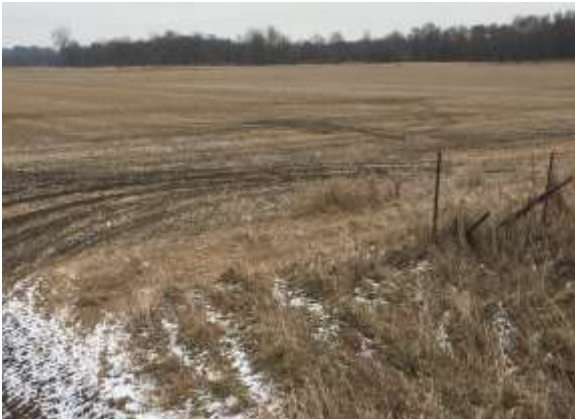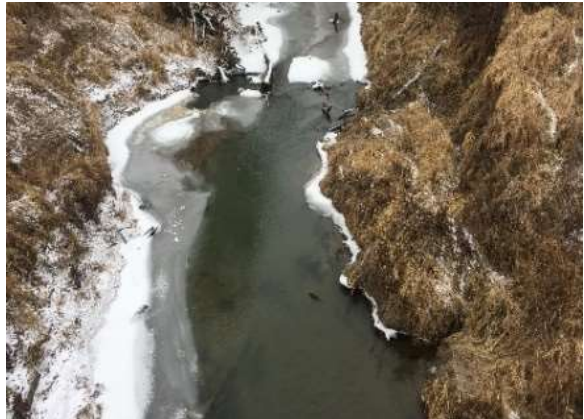

G

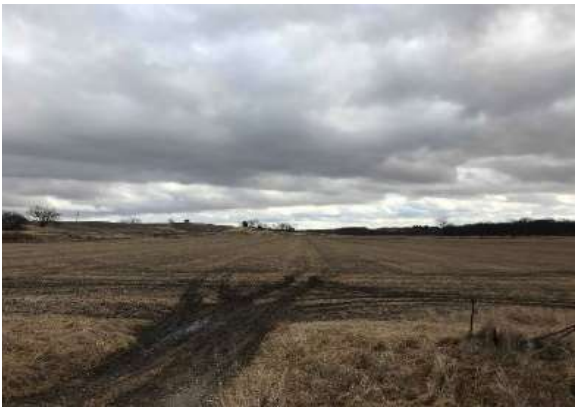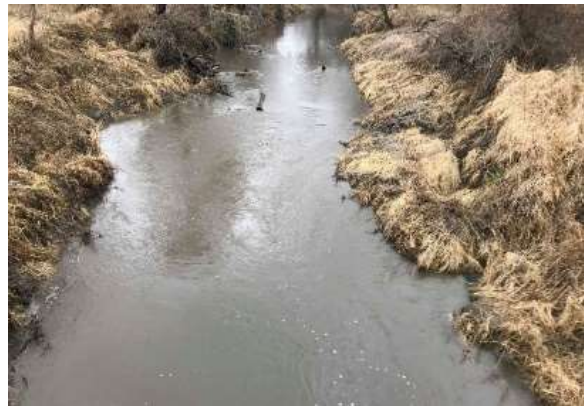

H

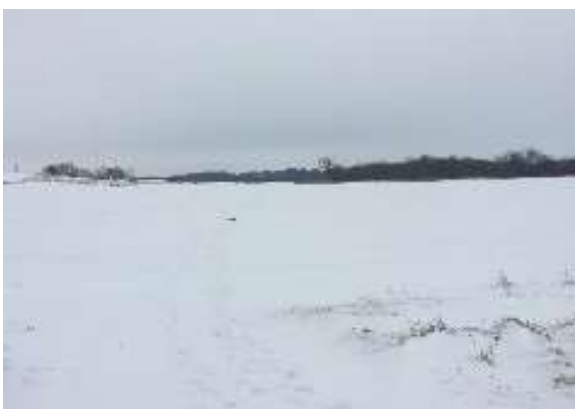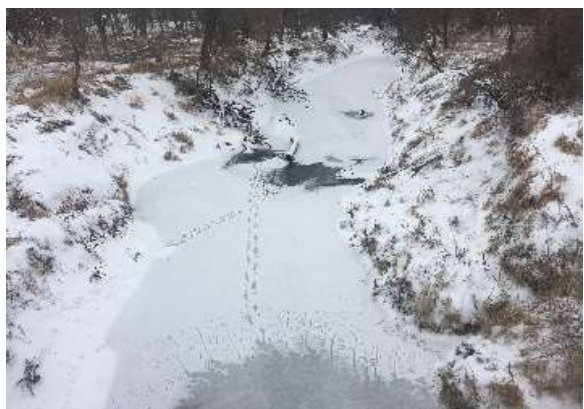

I

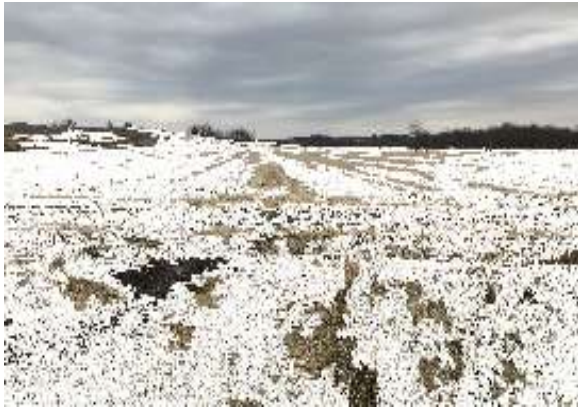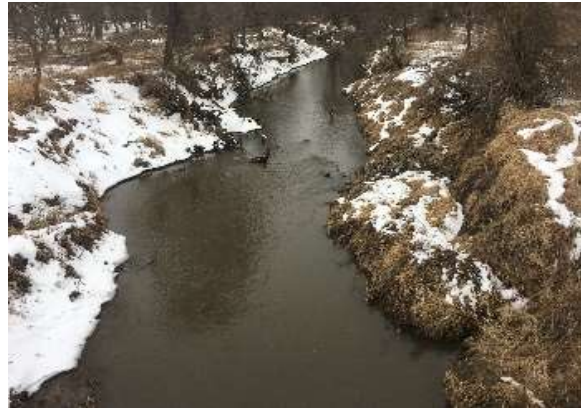

J

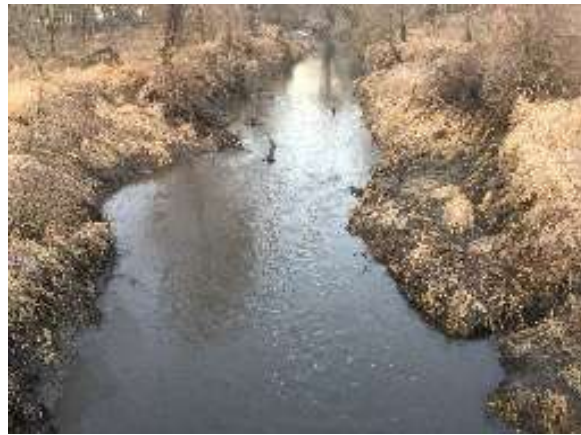

Figure S1. Seasonal views for Clear Creek near Oxford, Iowa (05454220) showing the landscape upstream from the sampling location (left photos, J photo unavailable), and the stream at the sampling location (right photos) on the following dates and streamflow; (A) September 23, 2019 ( $1.1 \text{ m}^3/\text{sec}$ ); (B) October 6, 2019 ( $2.4 \text{ m}^3/\text{sec}$ ); (C) October 21, 2019 ( $1.0 \text{ m}^3/\text{sec}$ ); (D) November 7, 2019 ( $0.7 \text{ m}^3/\text{sec}$ ); (E) November 17, 2019 ( $0.7 \text{ m}^3/\text{sec}$ ); (F) December 17, 2019 ( $0.5 \text{ m}^3/\text{sec}$ ); (G) December 29, 2019 ( $2.8 \text{ m}^3/\text{sec}$ ); (H) January 22, 2020 (streamflow data unavailable); (I) February 3, 2020 (streamflow data unavailable); and (J) March 10, 2020 ( $2.6 \text{ m}^3/\text{sec}$ ).



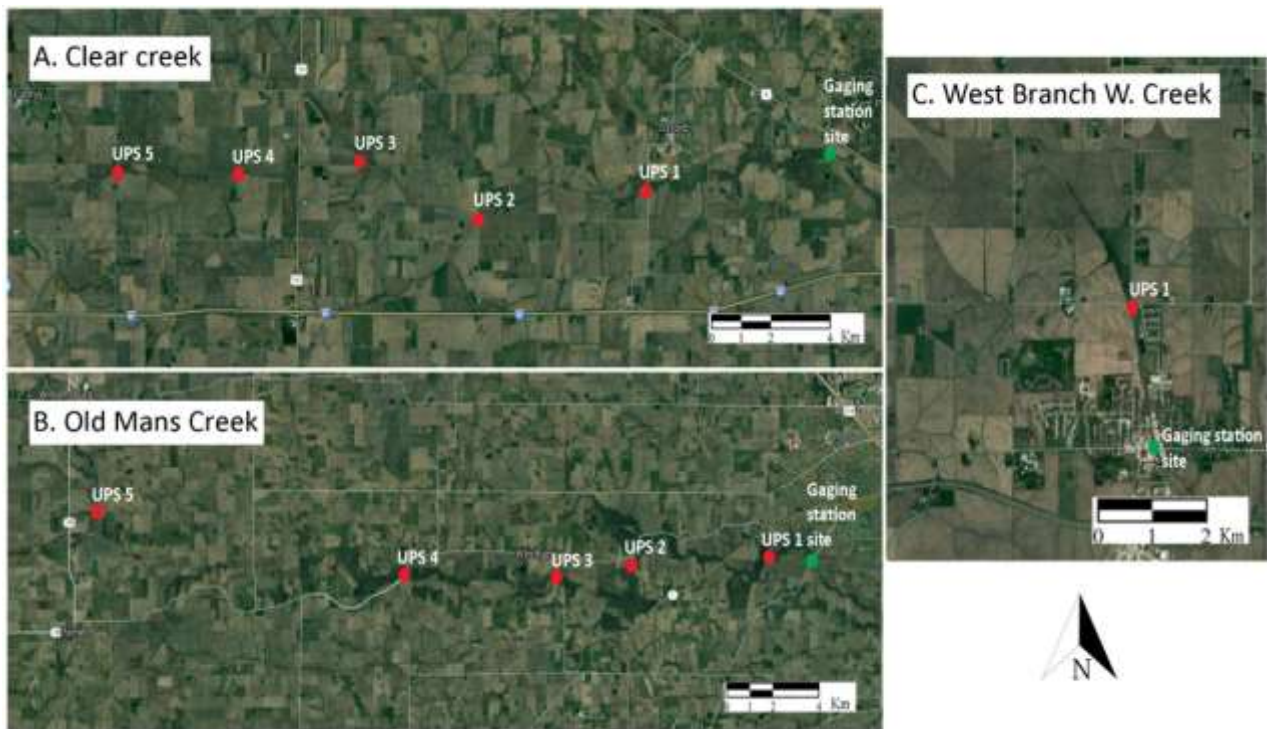

Figure S2. Location of sample collection upstream from (A) Clear Creek near Oxford in Iowa (05454220), (B) Old Mans Creek near Iowa City (05455100), and (C) West Branch Wapsinonoc Creek at West Branch, Iowa (0546494170), December 29, 2019. The green circles are the gaging station sites and the red circles are the upstream sites (UPS 1 to UPS 5) for all basins.

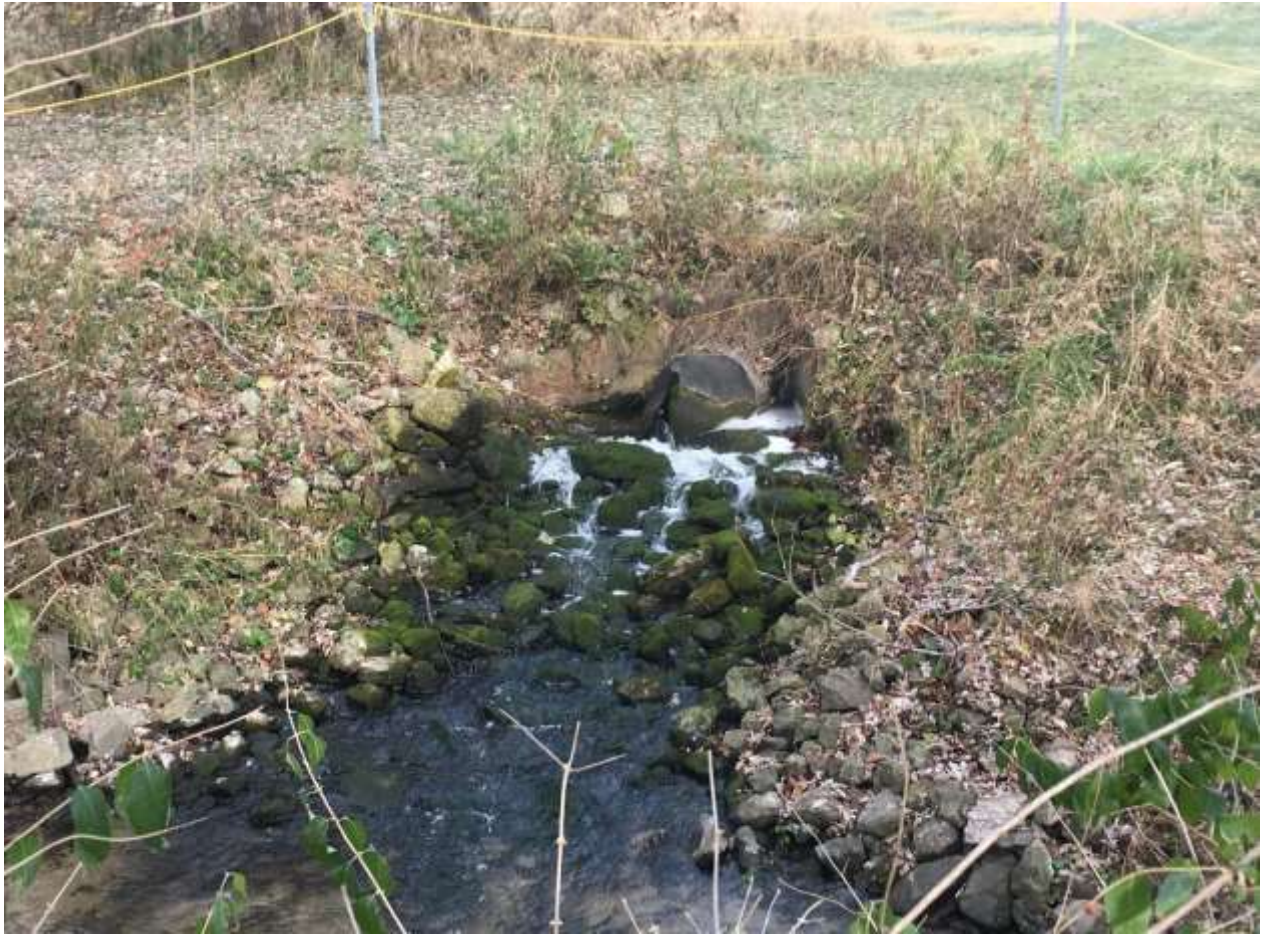

Figure S3. Effluent from wastewater treatment plant approximately 5.1 km upstream from the sampling site at the Muddy Creek reference basin; samples were collected on November 8, 2019 and January 22, 2020.



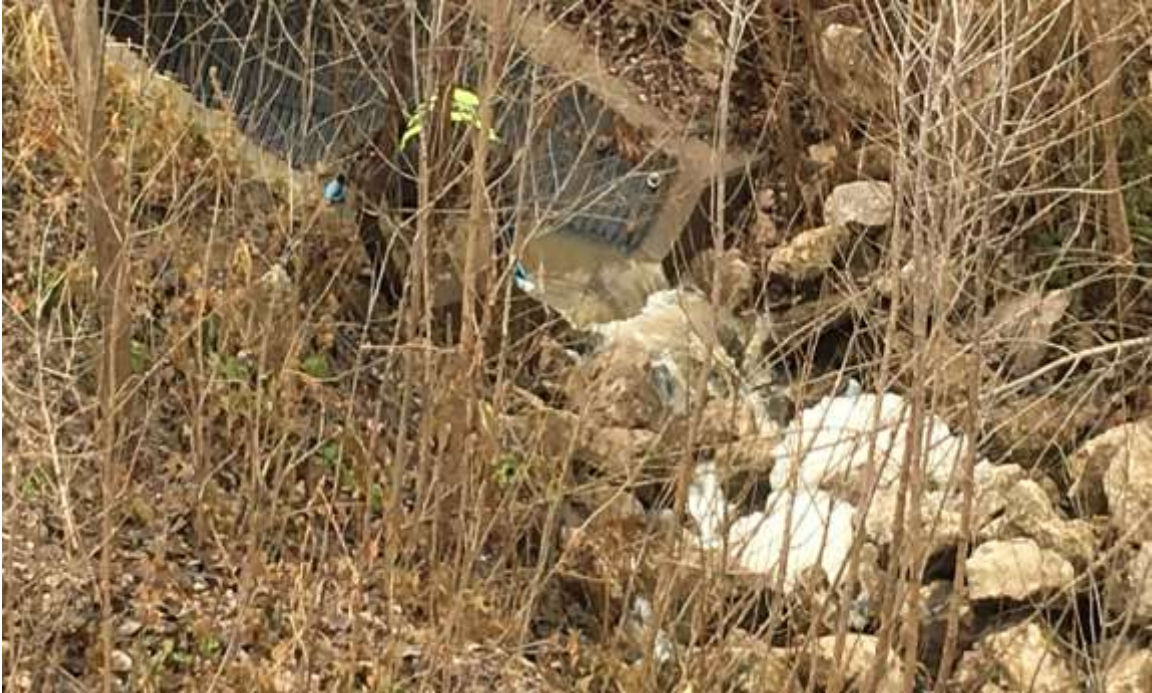

A

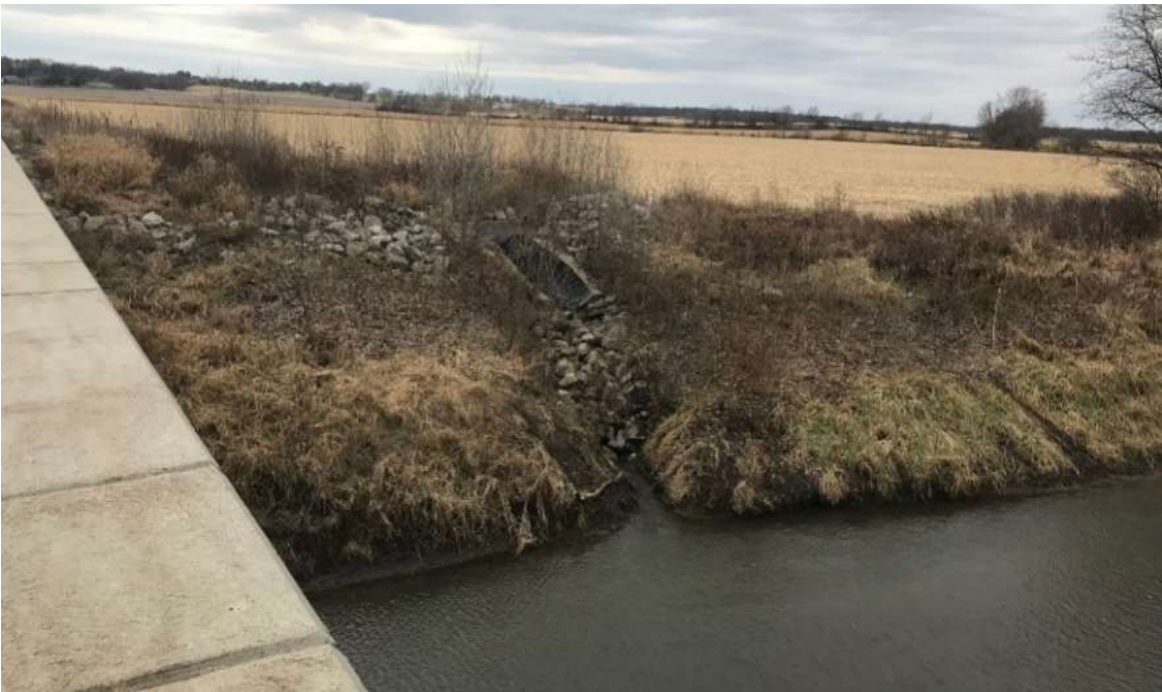

B

Figure S4. The side ditch site at the Old Mans Creek near Iowa City, Iowa (05455100); (A) the side ditch and (B) the ditch in relation to the field flowing through corn and soybean fields into the creek; samples were collected on November 21, 2019, and February 3, February 18 and March 10, 2020.

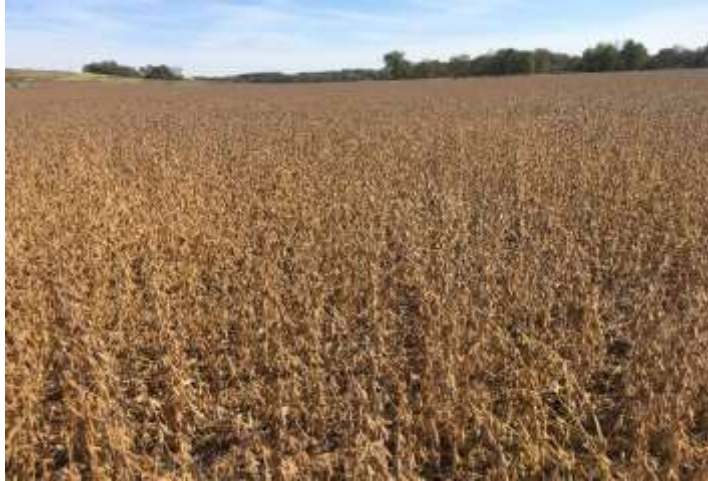

A

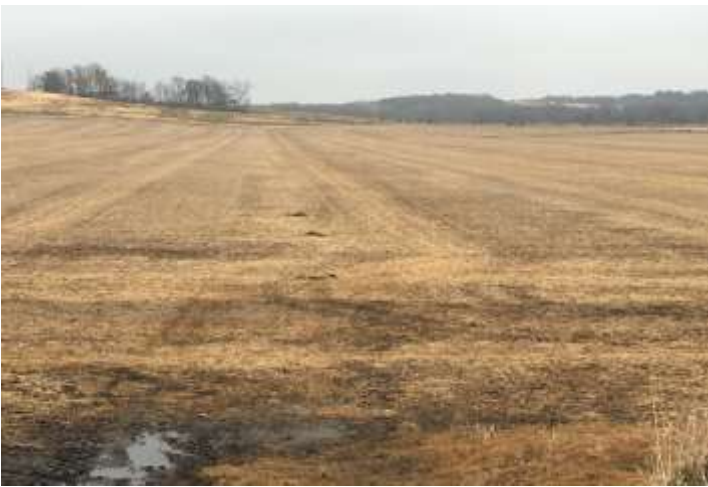

B

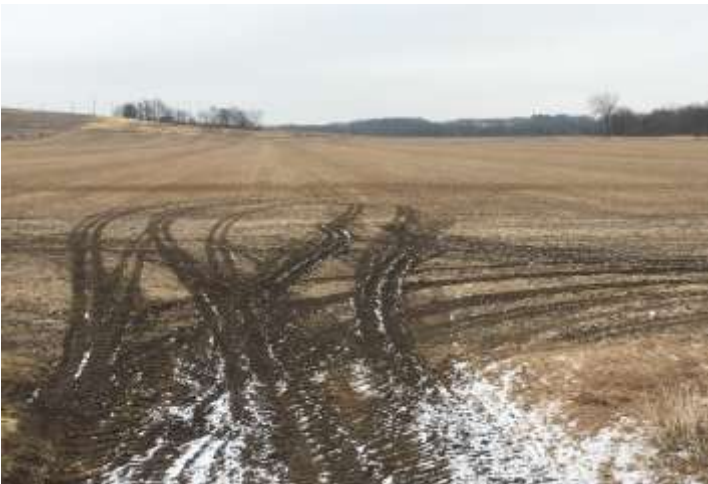

C

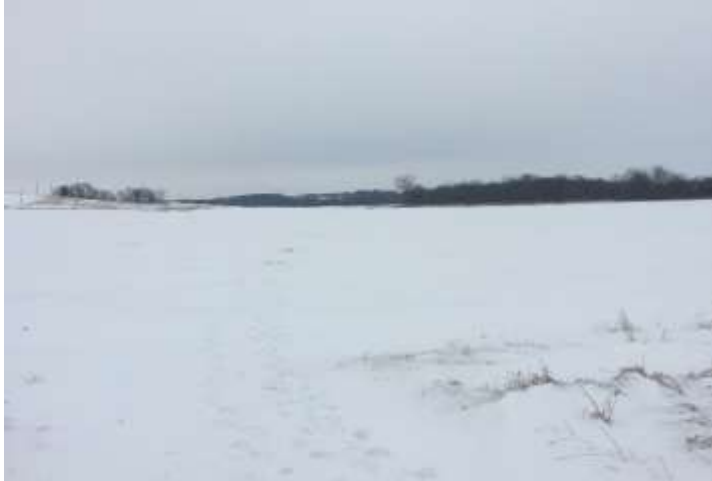

D

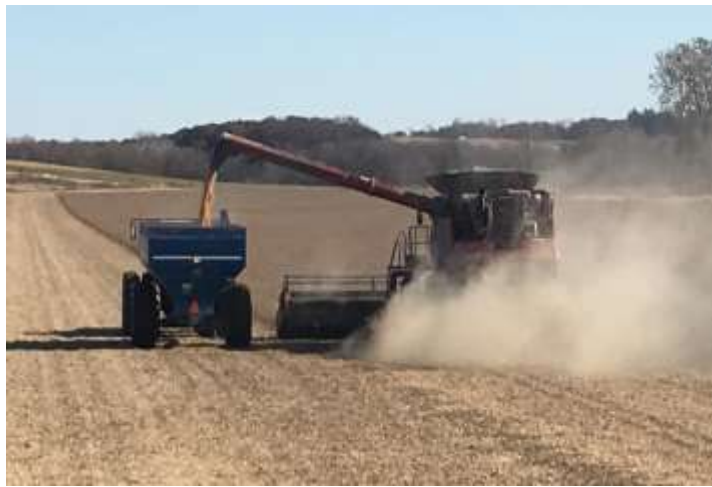

E

Figure S5. Temporal variations of the field adjacent to Clear Creek upstream from Clear Creek near Oxford, IA (05454220), samples collected on (A) October 18, 2019, (B) November 19, 2019, (C) December 17, 2019, and (D) January 22, 2020. The soybean field was harvested on (E) November 7, 2019.



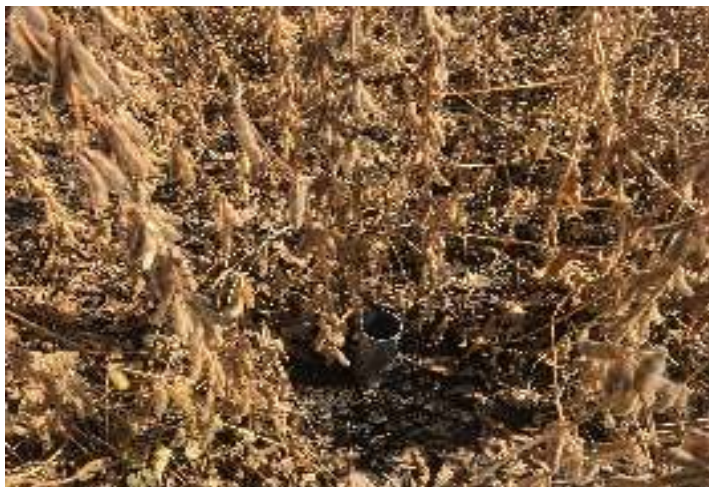

A

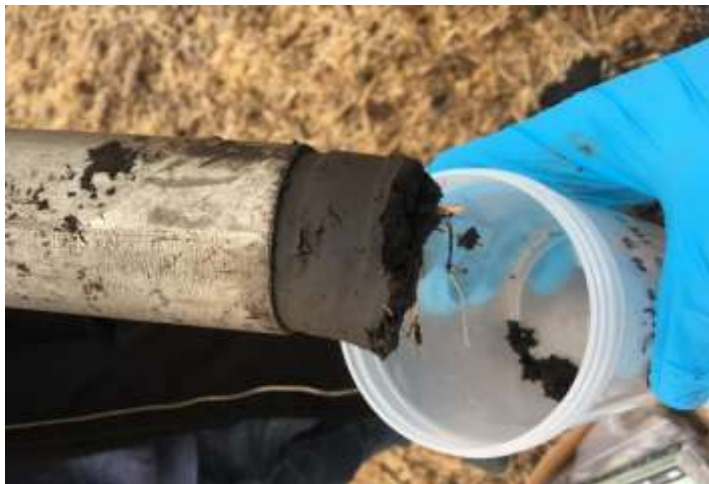

B

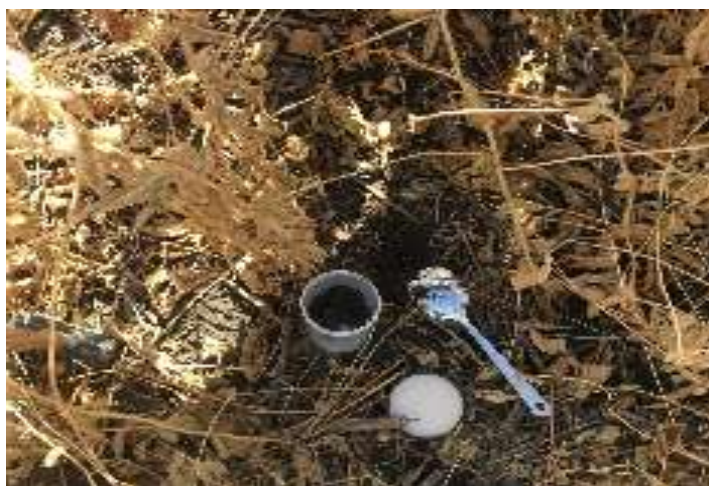

C

Figure S6. Demonstration of soil sampling using (A) the 12.7 cm metal pipe, and (B and C) soil sample collection in 500-mL polypropylene jars. The soil type of the field is Colo silt loam <sup>12</sup>.

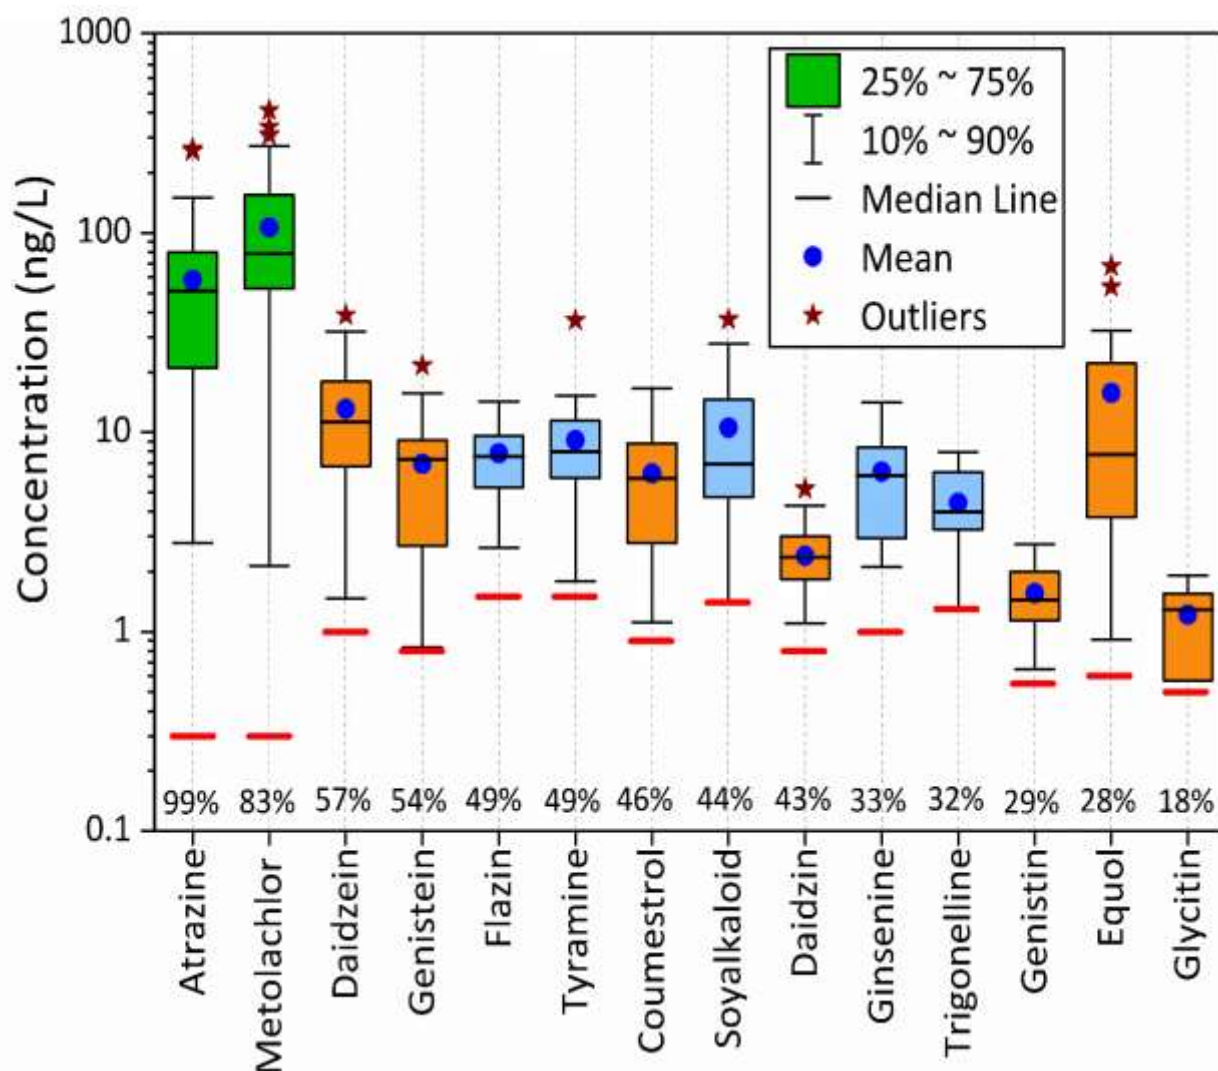

Figure S7. Distribution of phytotoxins and herbicides concentration in the samples (n=72) at all stream sampling sites of Clear Creek (n=16), West Branch Wapsinonoc Creek (n=16), Old Mans Creek (n=16), Iowa River (n=3), and Mississippi River (n=5), collected from September 2019 to March 2020. Blue point, red star, and percentiles (listed along the x-axis) represent site specific mean, outliers, and detection frequencies, respectively. The red line indicates the method LOD in ng/L. Only concentrations above the LOD are shown in the figure, but all measurements were included in the calculation of detection frequencies provided along the x-axis. Note that y-axis in a logarithmic scale. Targeted compounds grouped with color; green for herbicides, blue for alkaloids, and orange for phytoestrogens.

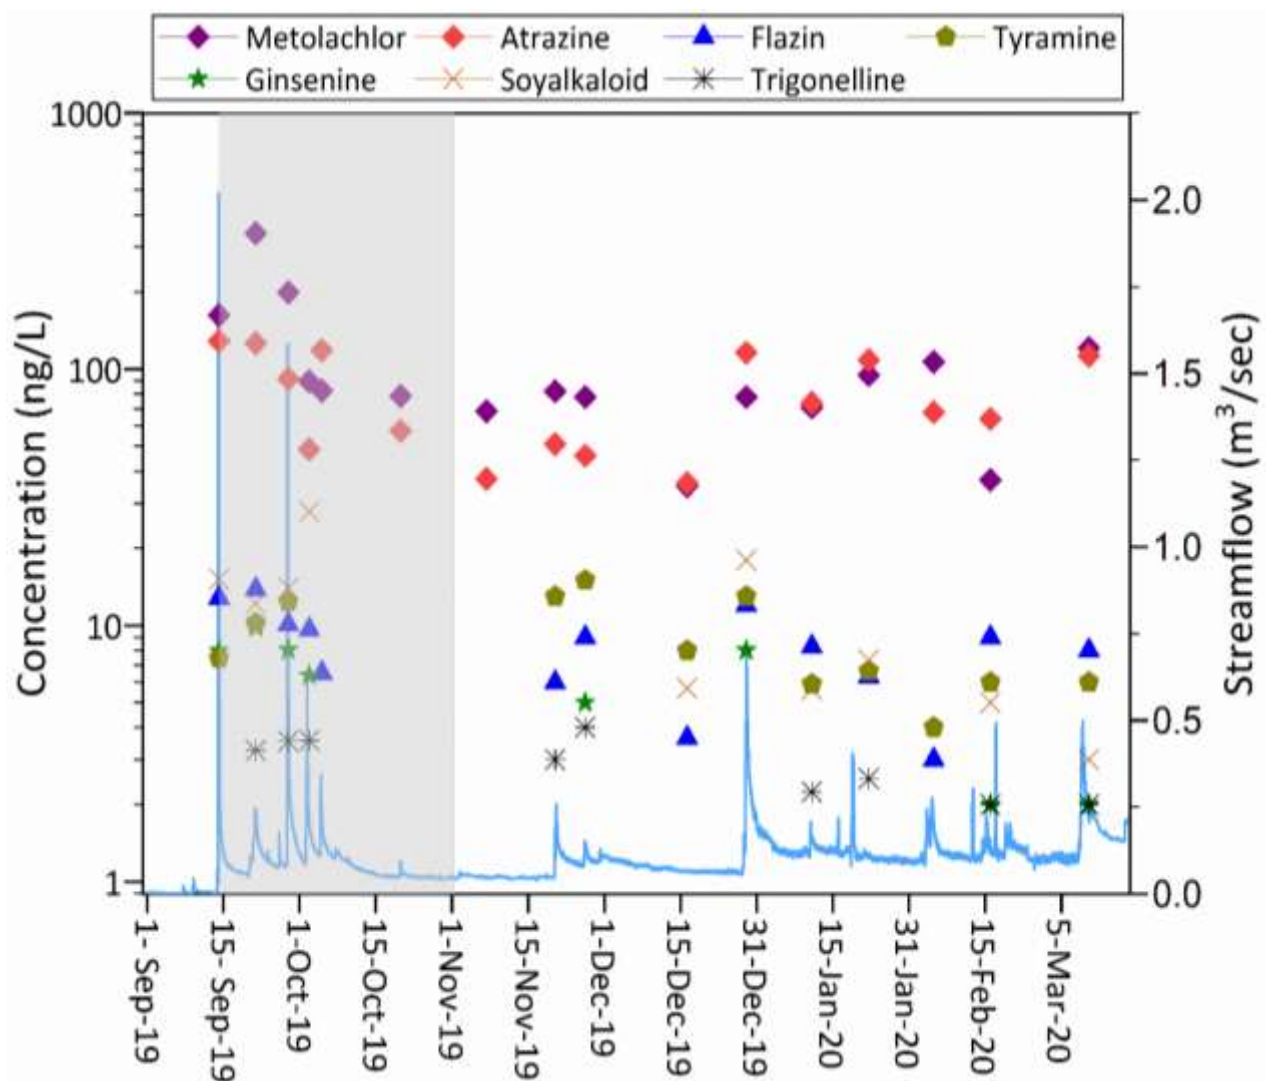

Figure S8. Concentrations of alkaloids, herbicides (atrazine and metolachlor), and streamflow for the samples (n=16) collected at West Branch Wapsinonoc Creek at West Branch, (0546494170), September 2019 through March 2020.<sup>13</sup> Note that the y-axes (left) is in a logarithmic scale, and the shaded area is the harvest season in Iowa.



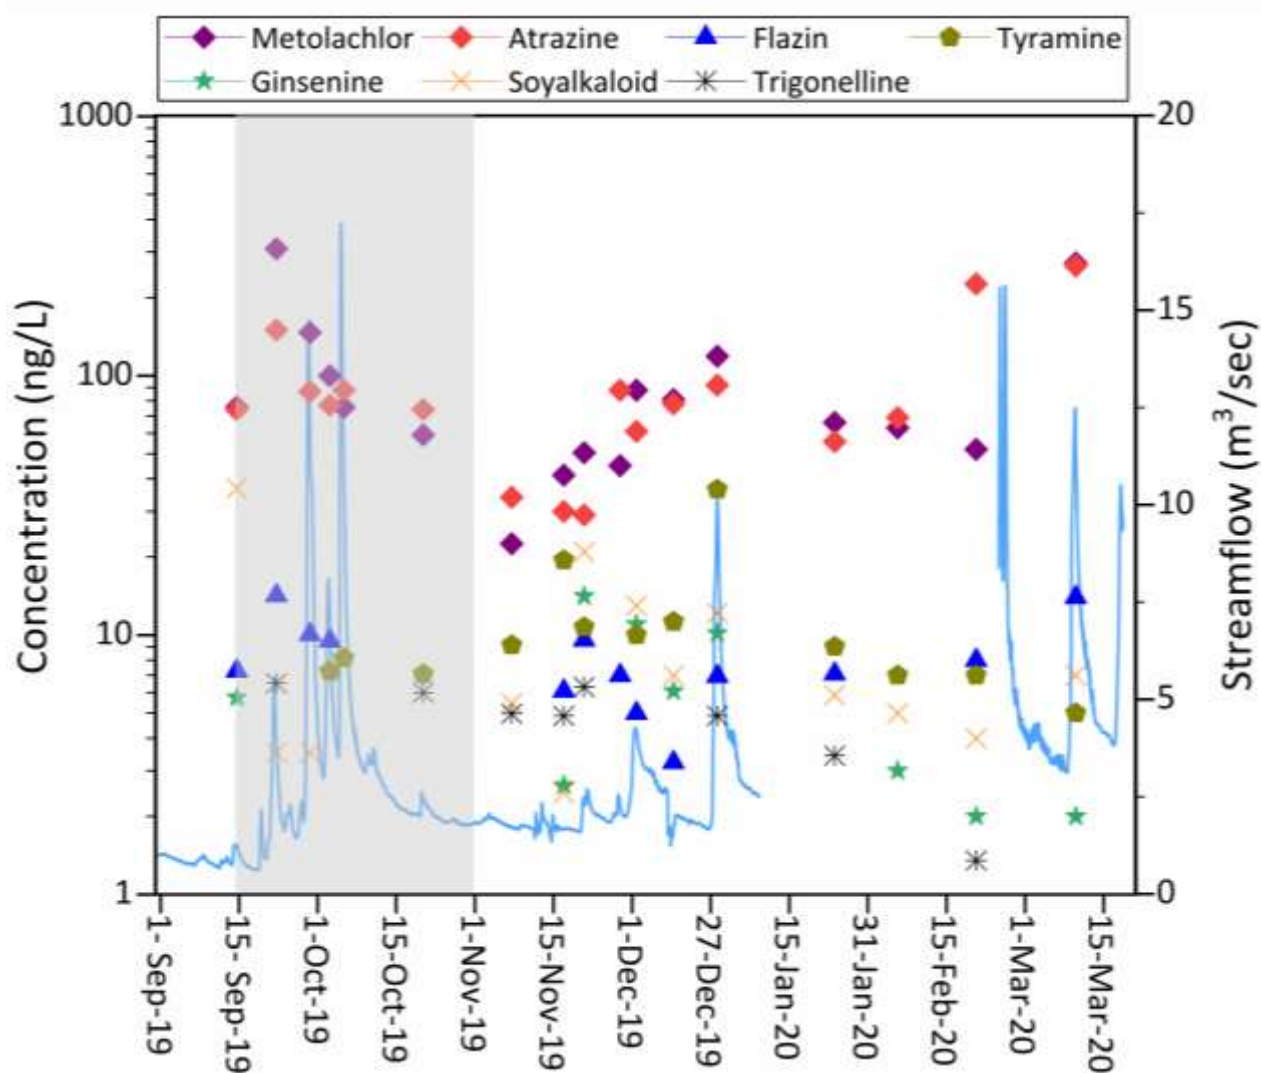

Figure S9. Concentrations of alkaloids, herbicides (atrazine and metolachlor), and streamflow for the samples (n=16) collected at Old Mans Creek near Iowa City (05455100), September 2019 through March 2020.<sup>13</sup> In January and February, streamflow data were unavailable due to frozen conditions. Note that the y-axes (left) is in a logarithmic scale, and the shaded area is the harvest season in Iowa.

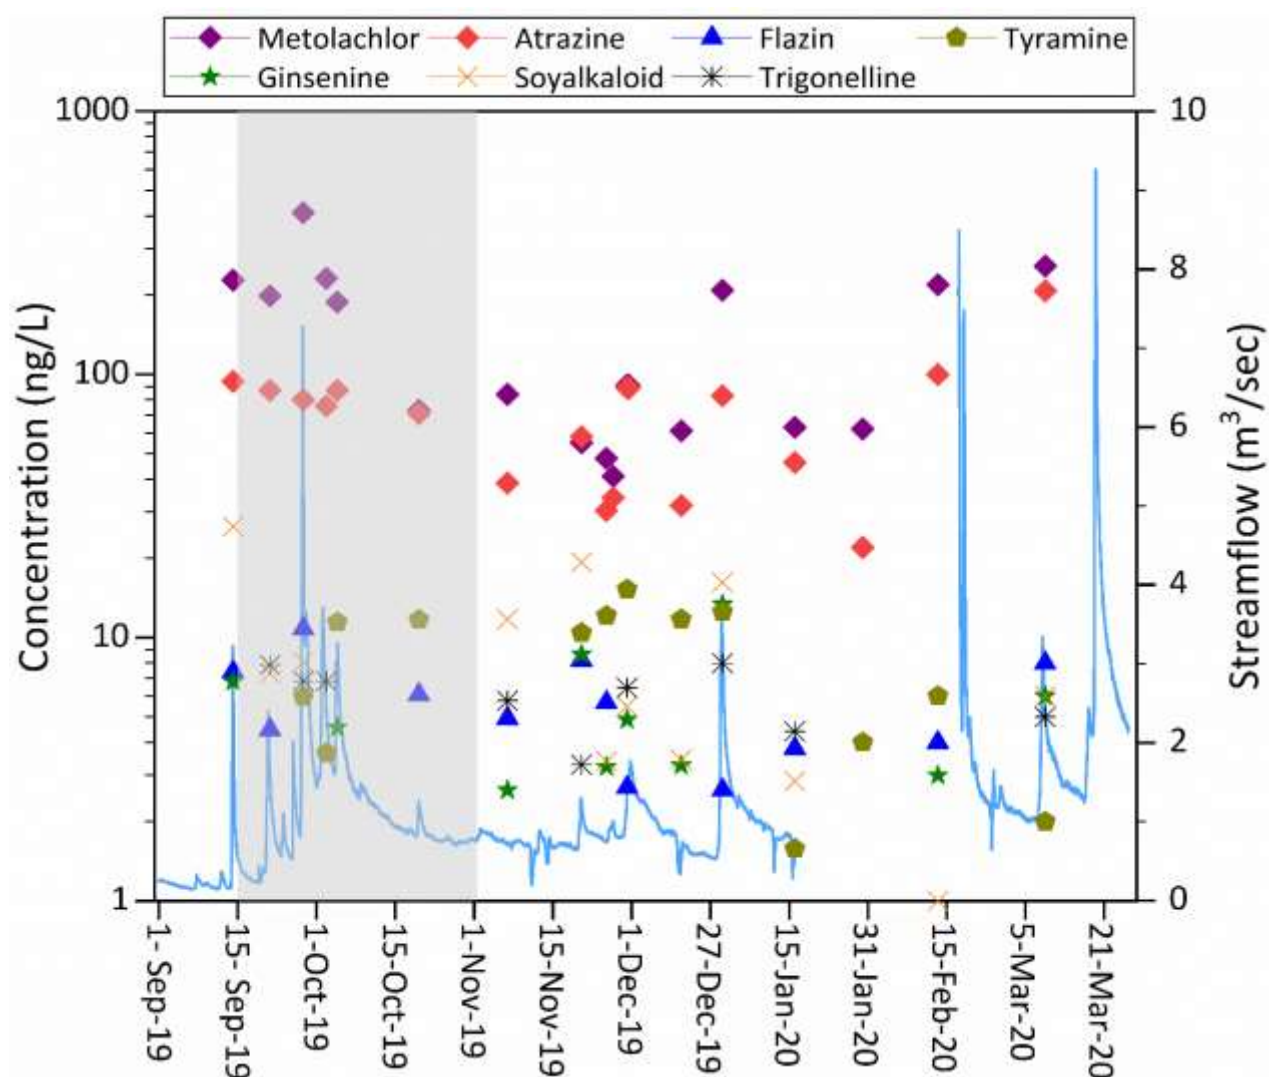

Figure S10. Concentrations of phytoestrogens, herbicides (atrazine and metolachlor), and streamflow for the samples (n=16) collected at Clear Creek, near Oxford, Iowa (05454220), September 2019 through March 2020.<sup>13</sup> In January and February, streamflow data were unavailable due to frozen condition. Note that the y-axes (left) is in a logarithmic scale, and the shaded area is the harvest season in Iowa.

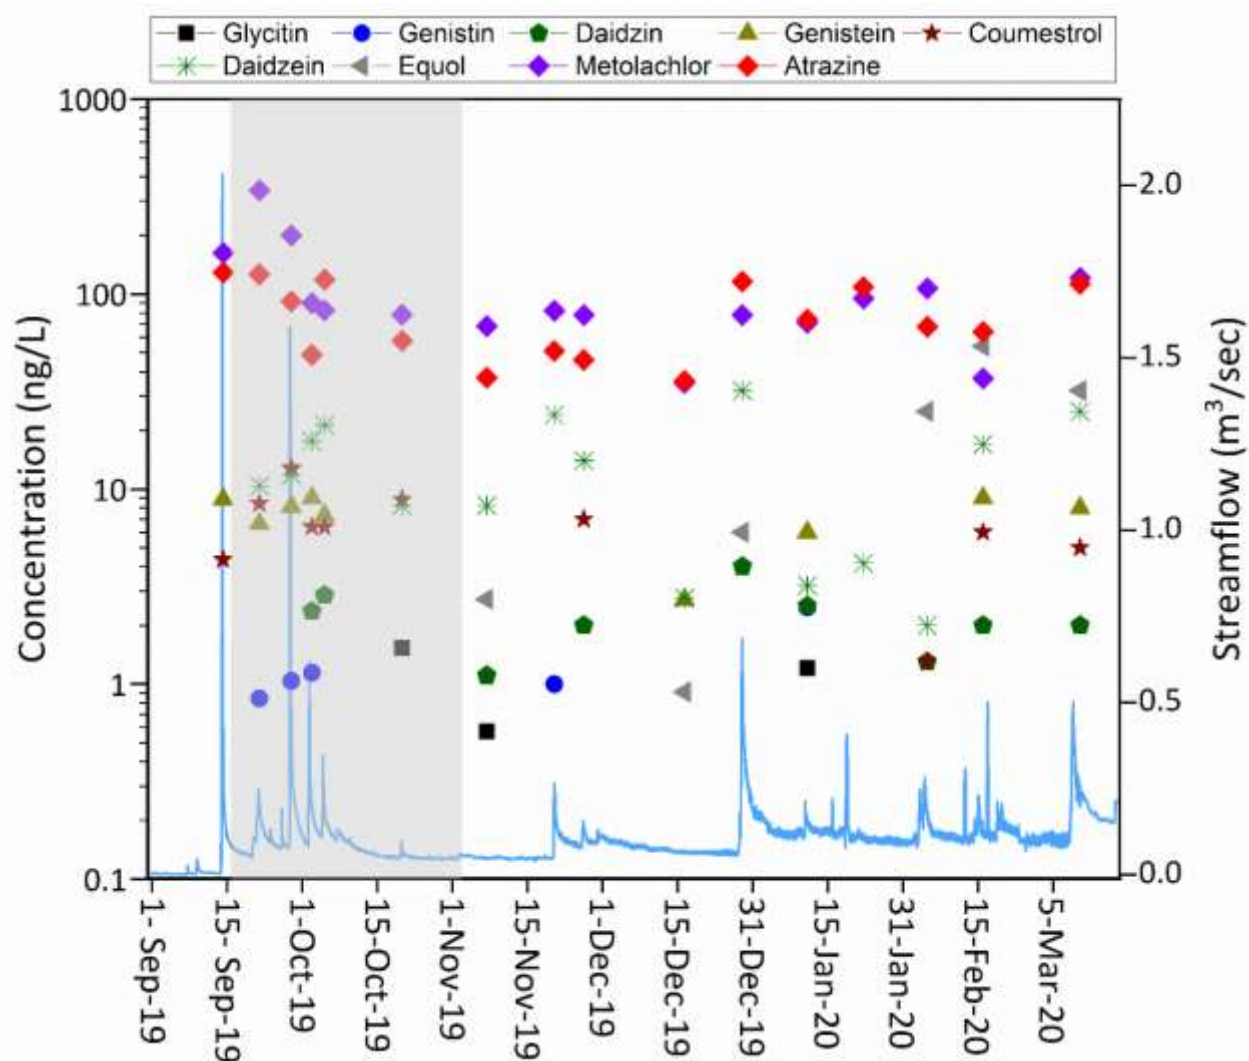

Figure S11. Concentrations of phytoestrogens, herbicides (atrazine and metolachlor), and streamflow for the samples (n=16) collected at West Branch Wapsinonoc Creek at West Branch, Iowa (0546494170), September 2019 through March 2020.<sup>13</sup> Note that the y-axes (left) is in a logarithmic scale, and the shaded area is the harvest season in Iowa.

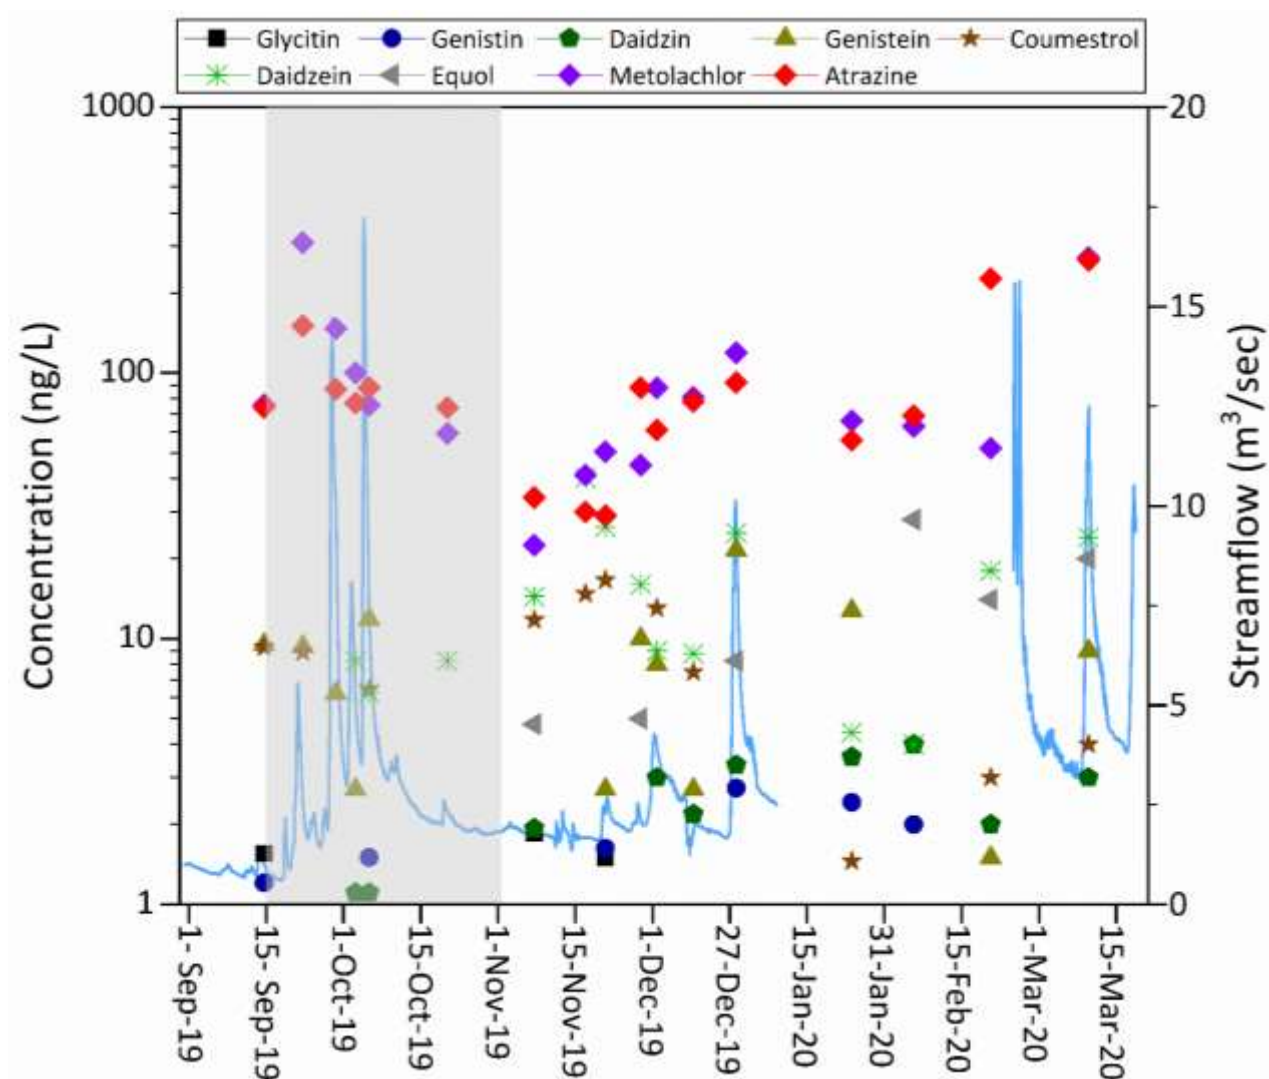

Figure S12. Concentrations of phytoestrogens, herbicides (atrazine and metolachlor), and streamflow for the samples ( $n=16$ ) collected at Old Mans Creek near Iowa City, Iowa (05455100), September 2019 through March 2020.<sup>13</sup> In January and February, streamflow data were unavailable due to frozen conditions. Note that the y-axes (left) is in a logarithmic scale, and the shaded area is the harvest season in Iowa.

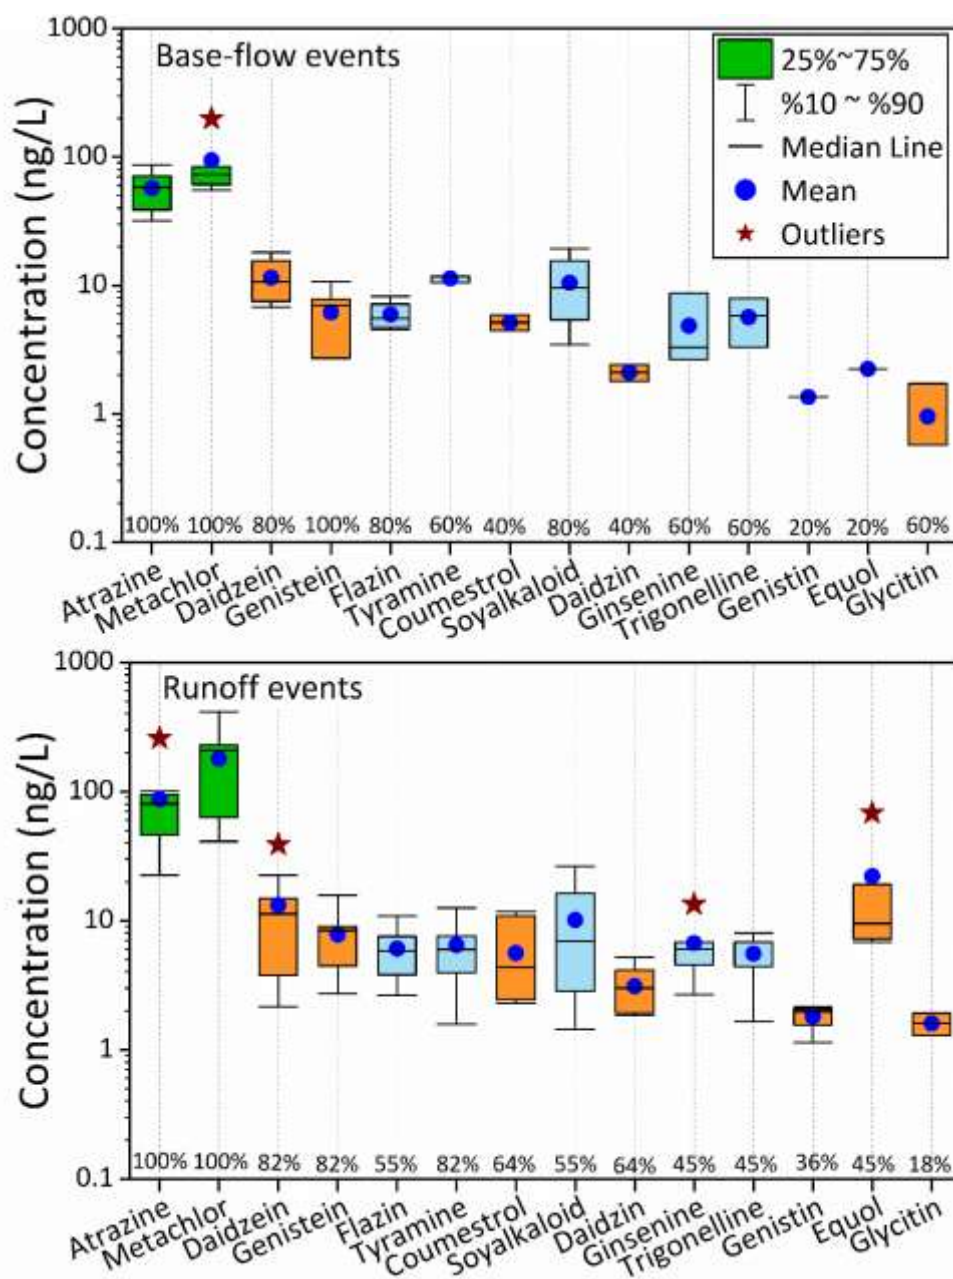

Figure S13. Concentrations of phytotoxins and herbicides (atrazine and metolachlor) for the samples collected during base-flow ( $n=5$ ) and runoff events ( $n=11$ ) at Clear Creek, near Oxford, Iowa (05454220), September 2019 through March 2020. Blue point, red star and percentiles (listed along the x-axes) represent site specific medians, outliers, and detection frequencies, respectively. Note that y-axes in a logarithmic scale. Targeted compounds are grouped by color; green for herbicides, blue for alkaloids, and orange for phytoestrogens. Only concentrations above the LOD are shown in the figure, but all measurements were included in the calculation of detection frequencies provided along the x-axes.



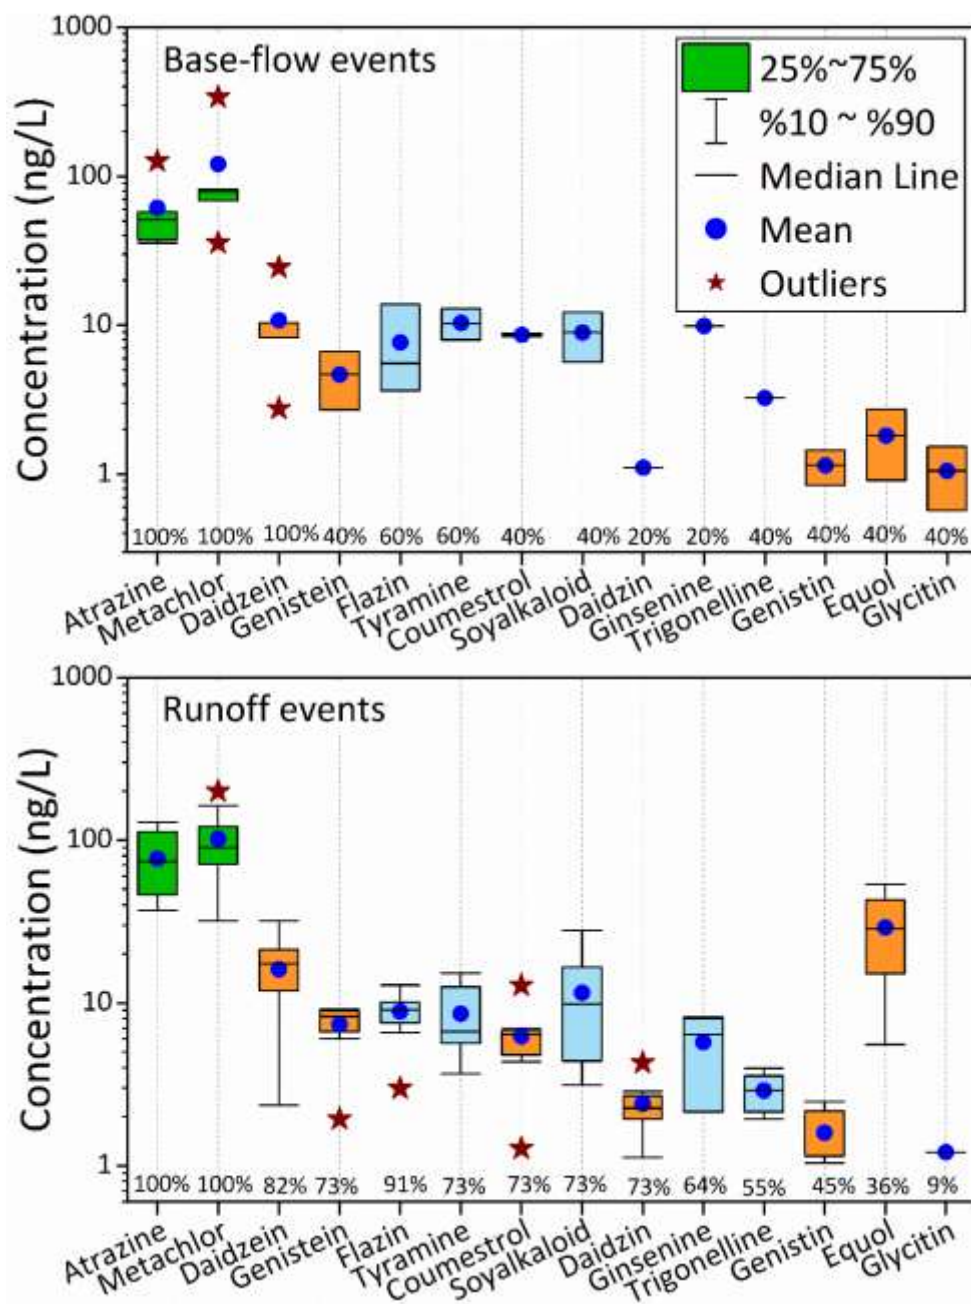

Figure S14. Concentrations of phytotoxins and herbicides (atrazine and metolachlor) for the samples collected during base-flow (n=5) and runoff events (n=11) at West Branch Wapsinonoc Creek at West Branch, Iowa (0546494170), September 2019 through March 2020. Blue point, red star and percentiles (listed along the x-axes) represent site specific medians, outliers, and detection frequencies, respectively. Note that y-axes in a logarithmic scale. Targeted compounds are grouped by color; green for herbicides, blue for alkaloids, and orange for phytoestrogens. Only concentrations above the LOD are shown in the figure, but all measurements were included in the calculation of detection frequencies provided along the x-axes.

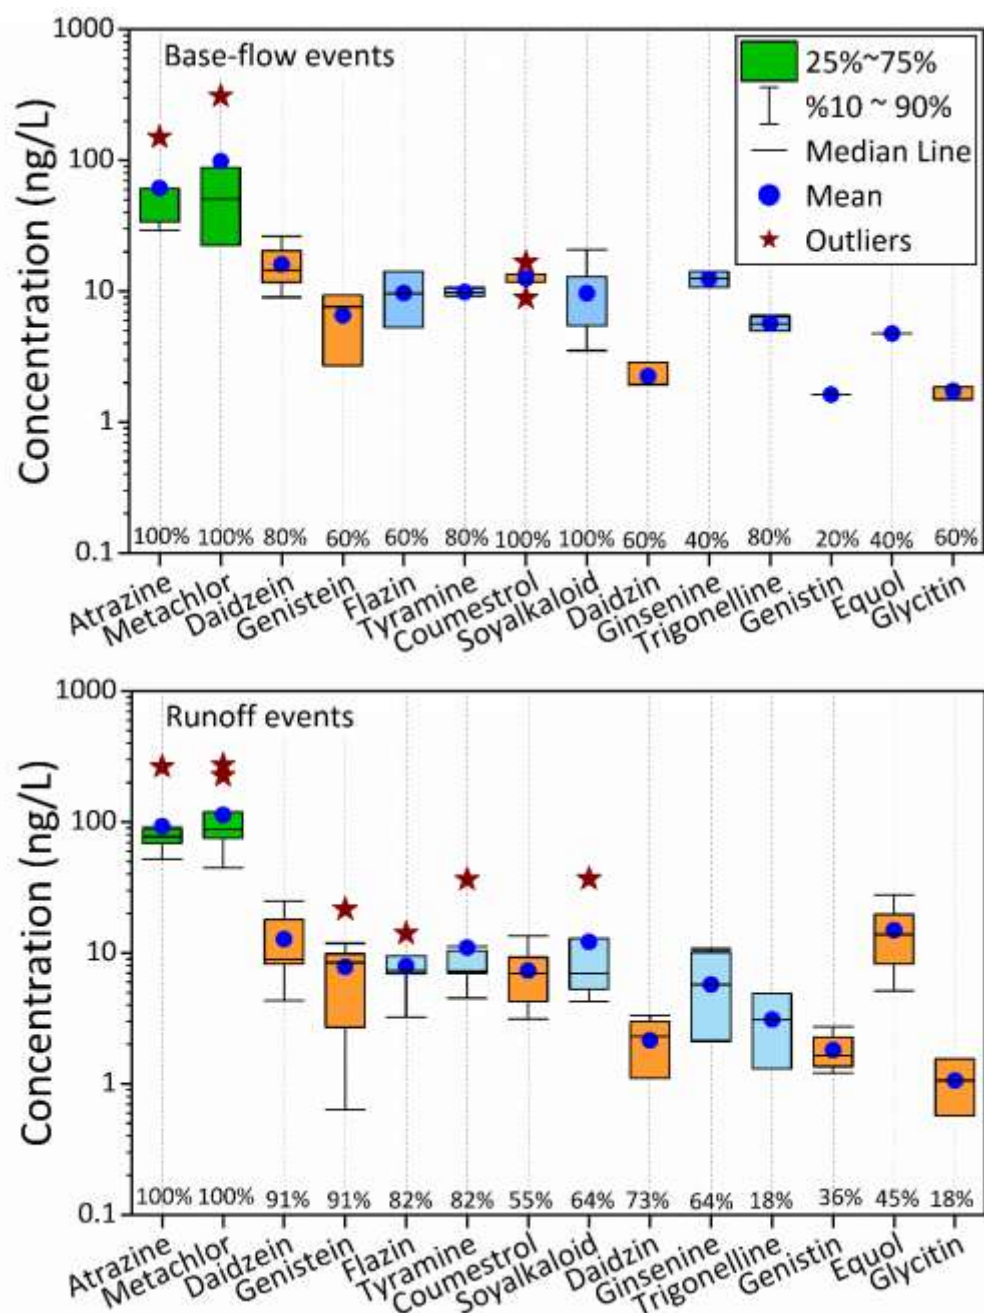

Figure S15. Concentrations of phytotoxins and herbicides (atrazine and metolachlor) for the samples collected during base-flow (n=5) and runoff events (n=11) at Old Mans Creek near Iowa City, Iowa (05455100), September 2019 through March 2020. Blue point, red star and percentiles (listed along the x-axes) represent site specific medians, outliers, and detection frequencies, respectively. Note that primary y-axes in a logarithmic scale. Targeted compounds are grouped by color; green for herbicides, blue for alkaloids, and orange for phytoestrogens. Only concentrations above the LOD are shown in the figure, but all measurements were included in the calculation of detection frequencies provided along the x-axes.

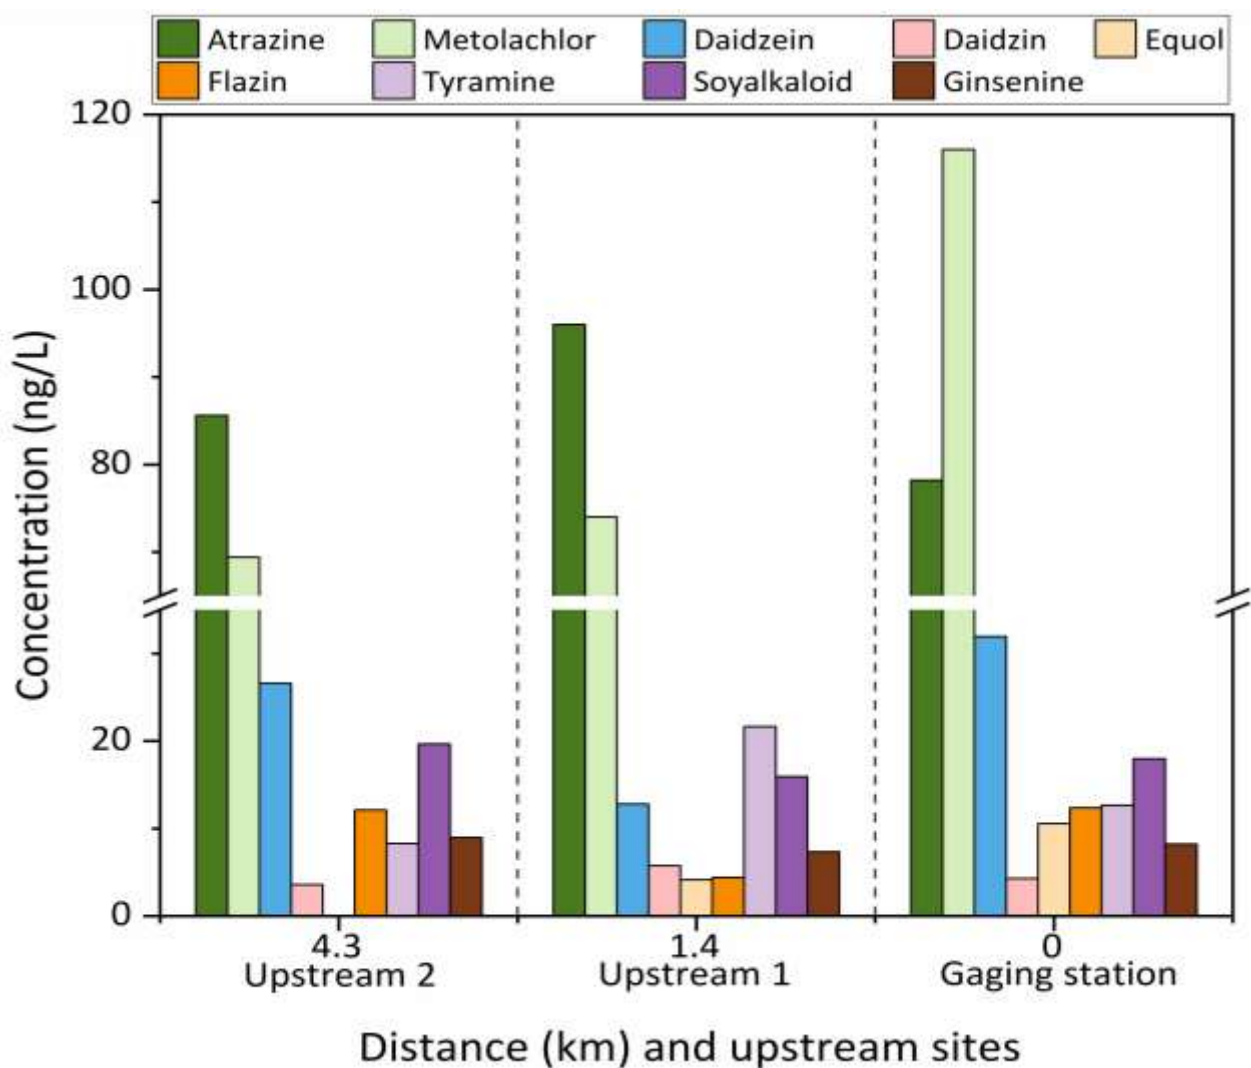

Figure S16. Concentrations of alkaloids, phytoestrogens, and herbicides (atrazine, and metolachlor) for the samples (n=2) collected at West Branch Wapsinonoc Creek at West Branch, Iowa (0546494170), and upstream sites 1 and 2, December 29, 2019. Coordinates (latitude & longitude) and the distance of upstream sites from gaging station location of 41.670028, -91.344250, upstream site 1: 41.685093, -91.346531, 1.4 km; upstream site 2: 41.702671, -91.366165, 4.3 km. Note the split scale of the y-axes.



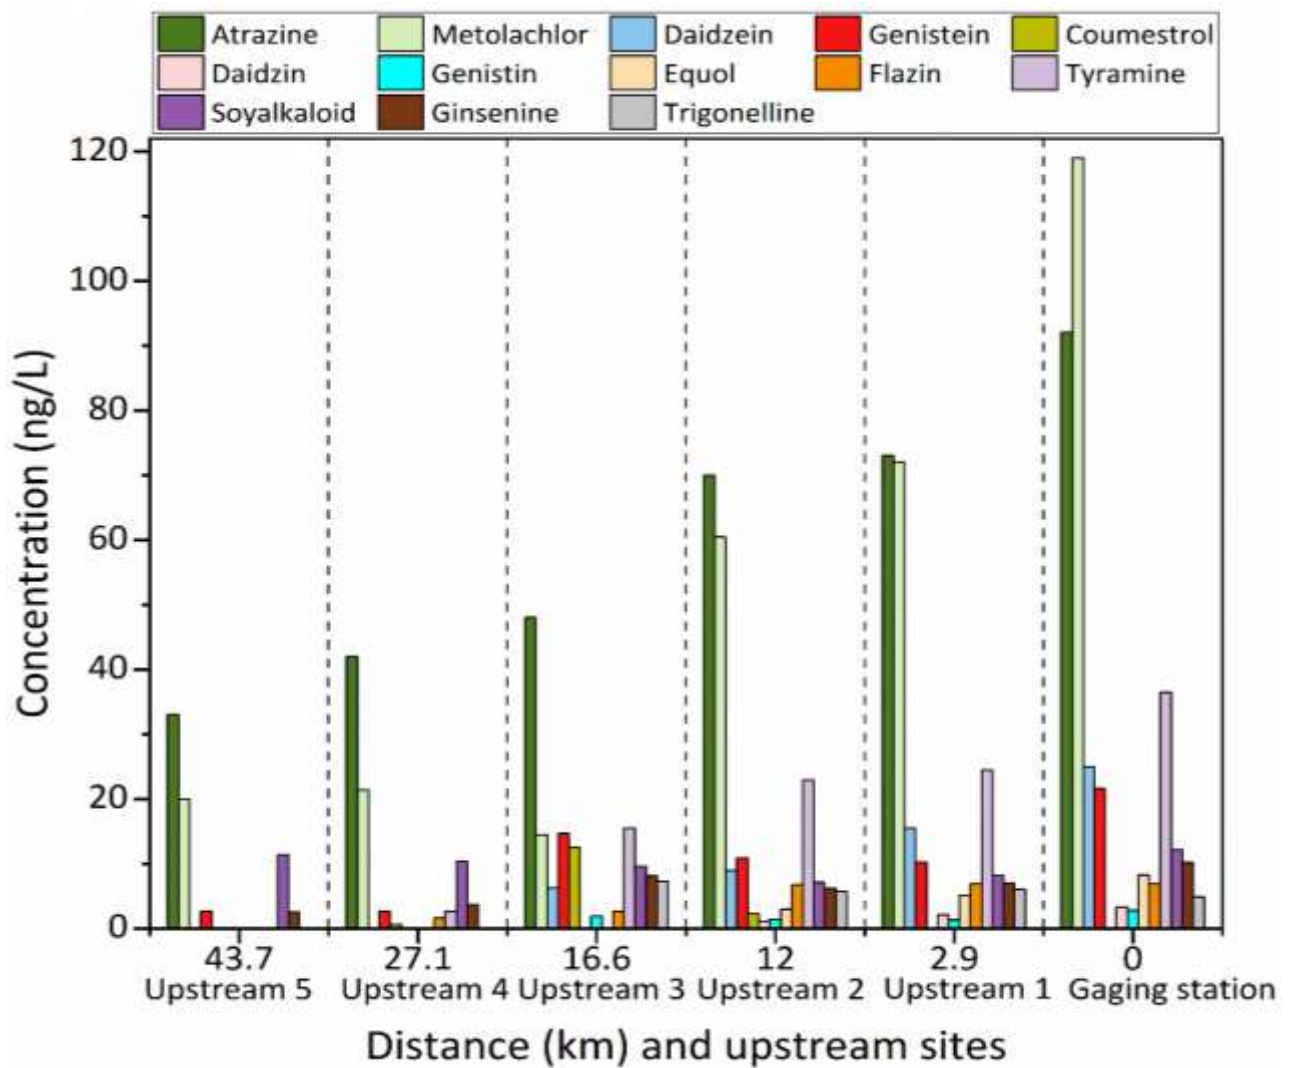

Figure S17. Concentrations of alkaloids, phytoestrogens, and herbicides (atrazine, and metolachlor) for the samples (n=5) collected at the Old Mans Creek near Iowa City, Iowa (05455100), and upstream sites 1-5, December 29, 2019. Coordinates (latitude & longitude) and the distance of upstream sites from the gaging station location of 41.606497, -91.615656; upstream site 1: 41.608519, -91.638557, 2.9 km; upstream site 2: 41.604250, -91.709569, 12.0 km; upstream site 3: 41.601135, -91.751027, 16.6 km; upstream site 4: 41.603295, -91.829931, 27.1 km; upstream site 5: 41.622762, -91.992910, 43.7 km.

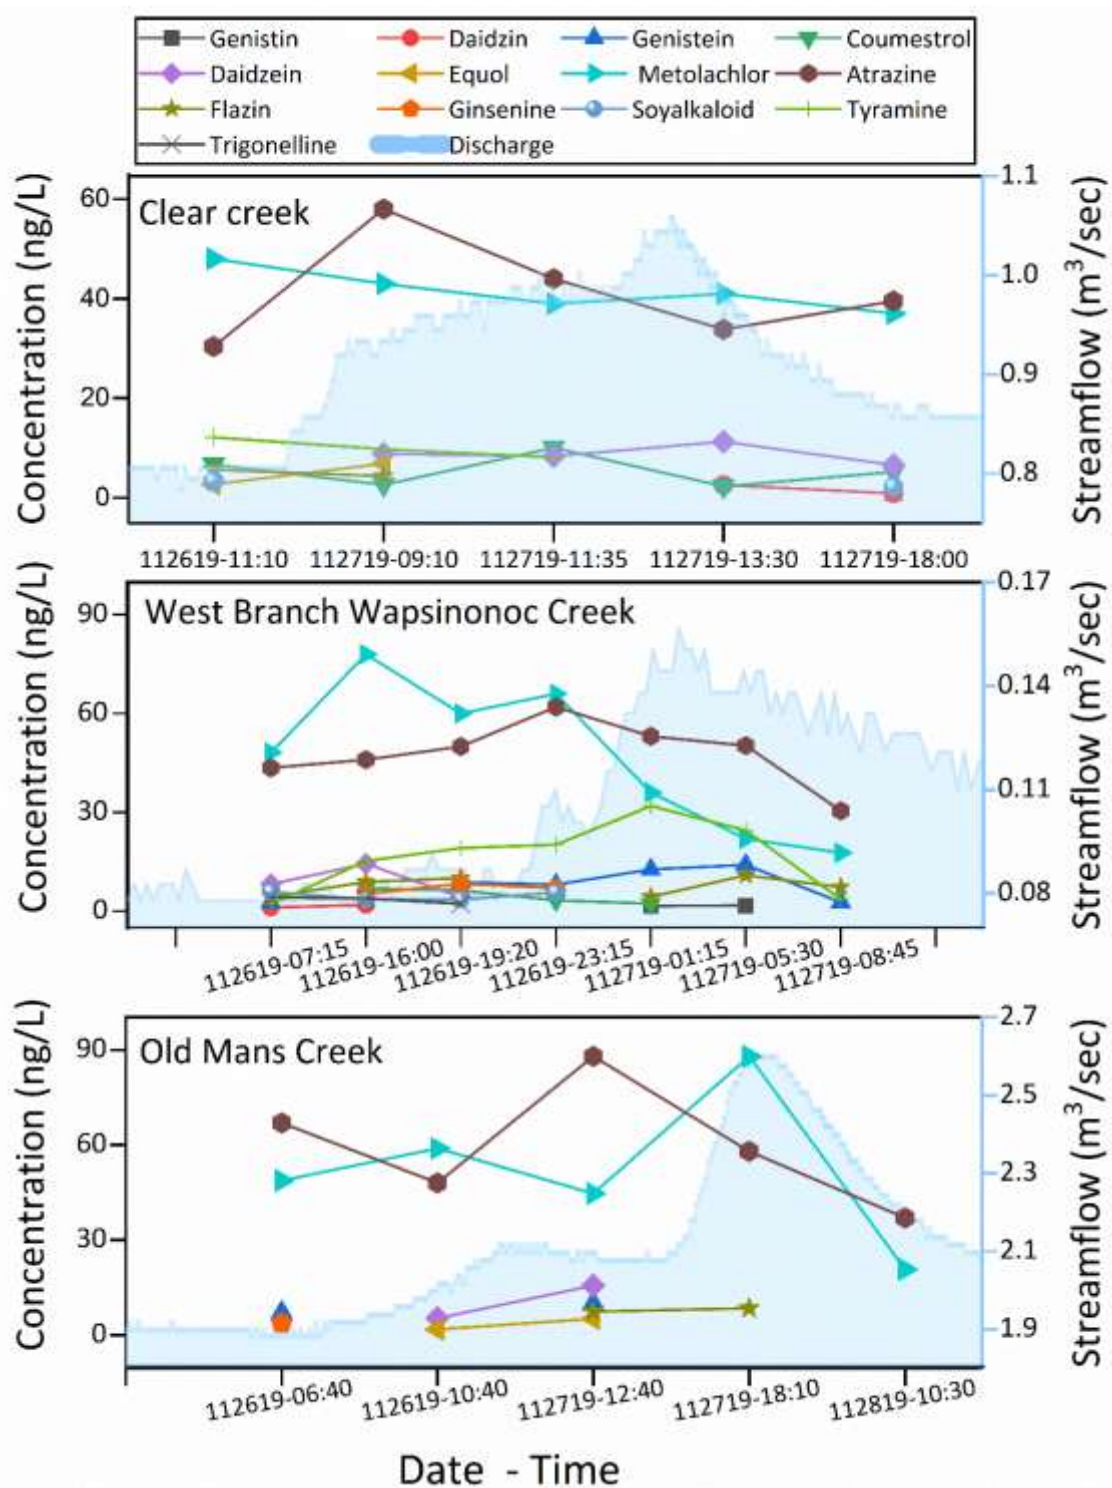

Figure S18. Concentrations of phytotoxins, and herbicides (atrazine and metolachlor) for the samples collected during the storm events, and streamflow at Clear Creek near Oxford, Iowa (n=5), West Branch Wapsinonoc Creek at West Branch, Iowa (n=7), and Old Mans Creek (n=5) near Iowa City, Iowa, November 2019.

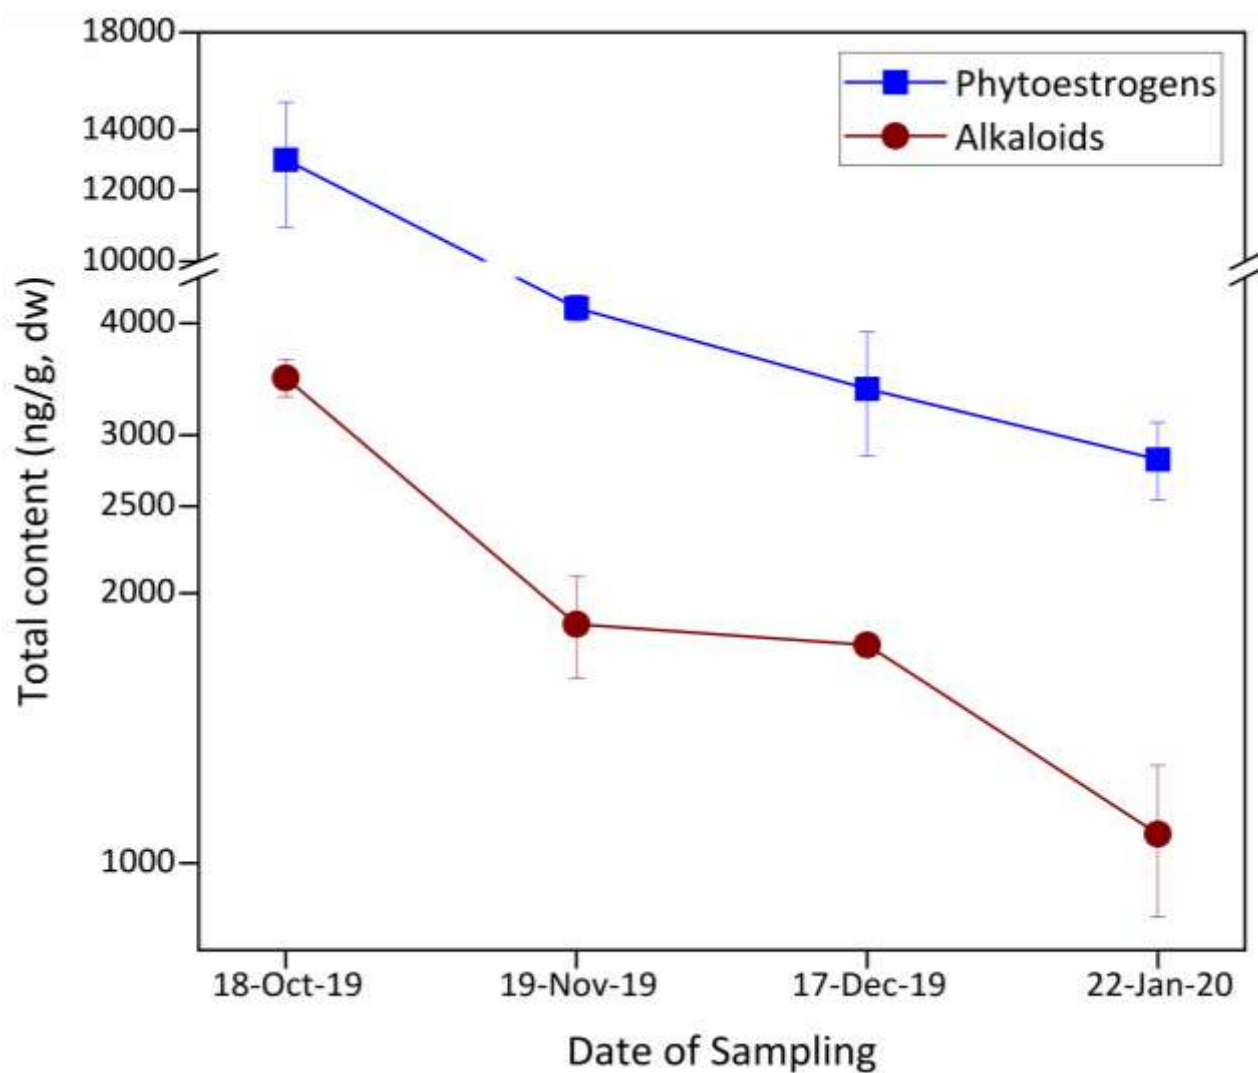

Figure S19. Alkaloid and phytoestrogen concentrations (ng/g) in plant tissues sampled from a selected agricultural field in the Clear Creek Basin near Oxford, Iowa, collected monthly on October 18, November 19, December 17, 2019, and January 22, 2020. Data points are given as mean ( $n=2$ ) and error bars indicate standard deviations. Note the split scale of the y-axes.

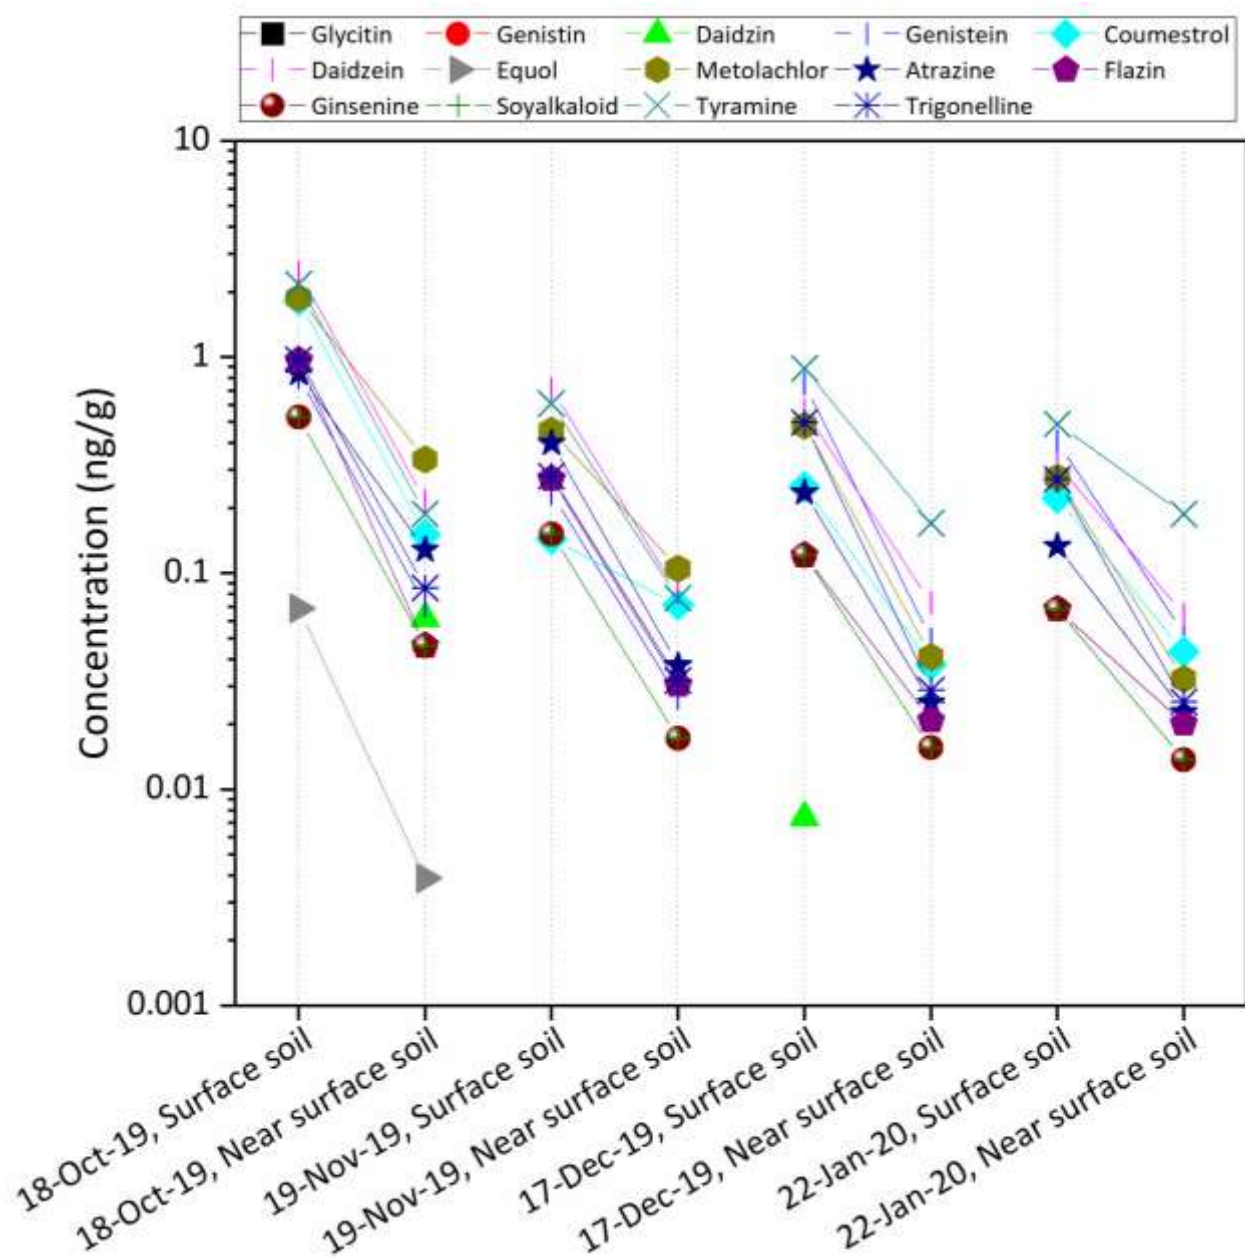

Figure S20. Alkaloid and phytoestrogen concentrations (ng/g) in soils sampled from a selected agricultural field in the Clear Creek Basin near Oxford, Iowa, collected monthly on October 18, November 19, and December 17, 2019 and in January 22, 2020. Data points are given as mean of (n =2). Note that the y-axis is in a logarithmic scale.

## References

1. U. S. Geological Survey, USGS water data for the nation. U. S. Geological Survey National Water Information System Database. 2019. <https://doi.org/10.5066/F7P55KJN>.
2. Hama, J. R.; Strobel, B. W., Pyrrolizidine alkaloids quantified in soil and water using UPLC-MS/MS. *RSC Advances* 2019, 9 (52), 30350-30357.
3. LeFevre, G. H.; Müller, C. E.; Li, R. J.; Luthy, R. G.; Sattely, E. S., Rapid phytotransformation of benzotriazole generates synthetic tryptophan and auxin analogs in *Arabidopsis*. *Environmental Science & Technology* 2015, 49 (18), 10959-10968.
4. U. S. Environmental Protection Agency, Estimation programs interface suite™ for microsoft® windows, v 4.11. *U.S. Environmental Protection Agency, Washington, DC, USA* 2012.
5. Hansch, C.; Leo, A.; Hoekman, D., *Exploring QSAR: fundamentals and applications in chemistry and biology*. American Chemical Society Washington, DC: 1995; Vol. 557.
6. Hoerger, C. C.; Wettstein, F. E.; Bachmann, H. J. r.; Hungerbühler, K.; Bucheli, T. D., Occurrence and mass balance of isoflavones on an experimental grassland field. *Environmental Science & Technology* 2011, 45 (16), 6752-6760.
7. Wauchope, R. D.; Buttler, T.; Hornsby, A.; Augustijn-Beckers, P.; Burt, J., The SCS/ARS/CES pesticide properties database for environmental decision-making. In *Reviews of Environmental Contamination And Toxicology*, Springer: 1992; pp 1-155.
8. Lewis, K.A., Tzilivakis, J., Warner, D. and Green, A. (2016) An international database for pesticide risk assessments and management. *Human and Ecological Risk Assessment: An International Journal*, 22(4), 1050-1064. DOI: 10.1080/10807039.2015.1133242.
9. Wang, J. Y.; Li, X. G.; Yang, X. W., Ginsenine, a new alkaloid from the berry of *Panax ginseng* C. A. Meyer. *Journal of Asian Natural Products Research* 2006, 8 (7), 605-608.
10. Wang, T.; Zhao, J.; Li, X.; Xu, Q.; Liu, Y.; Khan, I. A.; Yang, S., New alkaloids from green vegetable soybeans and their inhibitory activities on the proliferation of concanavalin A-activated lymphocytes. *Journal of Agricultural and Food Chemistry* 2016, 64 (8), 1649-1656.

11. Xiu, F.; Ying, Z.; Ying, X.; Yang, G., Pharmacokinetic studies of soyalkaloid A from *Portulaca oleracea* L. using ultra high-performance liquid chromatography electrospray ionization quadrupole–time of flight mass spectrometry and its antioxidant activity. *Biomedical Chromatography* 2019, 33 (2), e4399.
12. Natural Resources Conservation Service, Web Soil Survey. 2017. <https://www.nrcs.usda.gov/wps/portal/nrcs/main/soils/survey/class/> (accessed; Febreuary 3, 2020)
13. U.S. Geological Survey, 2020, USGS water data for the Nation: U.S. Geological Survey National Water Information System database, accessed March 20, 2020, at <https://doi.org/10.5066/F7P55KJN>.
